# Supplementary material
Source: PubMed Central journal article supplement (PMC3811578)
Supplement: JB.00875-13_zjb999092857so1.pdf [file JB.00875-13_zjb999092857so1.pdf]

**Table S1. RNA-seq sample and sequencing information.**

| Condition                | <sup>2</sup> Bio # | <sup>3</sup> Tech # | <sup>4</sup> rRNA deplete | <sup>5</sup> Prep | Platform  | <sup>6</sup> Facility | Read Mapper  | <sup>7</sup> Total reads | <sup>8</sup> # map | <sup>9</sup> % map | <sup>10</sup> # m/ncRNA | <sup>11</sup> % m/ncRNA |
|--------------------------|--------------------|---------------------|---------------------------|-------------------|-----------|-----------------------|--------------|--------------------------|--------------------|--------------------|-------------------------|-------------------------|
| biofilm                  | 1                  | 1                   | Express                   | NEB (S)           | SOLiD V4  | UTGSAF                | SHRIMP 2.2.1 | 6,323,061                | 886,203            | 14%                | 85,547                  | 10%                     |
|                          |                    | 2                   | Express                   | NEB (S)           | SOLiD V4  | UTGSAF                | SHRIMP 2.2.1 | 9,817,673                | 2,354,500          | 24%                | 200,164                 | 9%                      |
| biofilm                  | 2                  | 1                   | Tex                       | NEB (S)           | SOLiD V4  | UTGSAF                | SHRIMP 2.2.1 | 14,060,736               | 3,165,547          | 23%                | 50,282                  | 2%                      |
|                          |                    | 2                   | Tex                       | Epicentre         | HiSeq2000 | Tufts                 | Bowtie 2.0.2 | 12,632,073               | 132,635            | 1%                 | 16,235                  | 12%                     |
|                          |                    | 3                   | NA                        | Epicentre         | HiSeq2000 | Tufts                 | Bowtie 2.0.2 | 8,208,689                | 557,369            | 7%                 | 120,289                 | 22%                     |
| abscess (6) <sup>1</sup> | 1                  | 1                   | Enrich                    | NEB (I)           | HiSeq2000 | UTGSAF                | Bowtie 2.0.2 | 25,297,104               | 5,798,615          | 23%                | 434,191                 | 7%                      |
| abscess (2)              | 2                  | 1                   | Enrich                    | NEB (I)           | HiSeq2000 | UTGSAF                | Bowtie 2.0.2 | 42,804,092               | 25,539,796         | 60%                | 839,805                 | 3%                      |
| abscess (2)              | 3                  | 1                   | Enrich                    | NEB (I)           | HiSeq2000 | UTGSAF                | Bowtie 2.0.2 | 52,165,722               | 31,983,011         | 61%                | 915,676                 | 3%                      |

<sup>1</sup>abscess (#): “#” indicates the number of abscesses pooled per replicate

<sup>2</sup>Bio #: biological replicate for each condition

<sup>3</sup>Tech #: technical replicate for each biological replicate

<sup>4</sup>rRNA deplete: Express=Ambion MICROExpress kit, Enrich=Ambion MICROEnrich kit, Tex=Epicentre Terminator 5' monophosphate dependent exonuclease, and NA=no depletion method was utilized

<sup>5</sup>Prep: Library preparation kit used. NEB (S)=NEB Next Small RNA Sample Prep Set 3 for SOLiD, Epicentre=Epicentre ScriptMiner Small RNA Library Preparation kit, NEB (I)=NEB Next Multiplex Small RNA Library Prep Set for Illumina.

<sup>6</sup>Facility: Sequencing facility. UTGSAF=University of Texas Genome Sequencing and Analysis Facility, Tufts=Tufts University Core Facility Genomics.

<sup>7</sup>Total reads: the number of reads sequenced

<sup>8</sup># map: the number of reads mapping to the *A. actinomycetemcomitans* genome

<sup>9</sup>% map: the percentage of reads mapping to the *A. actinomycetemcomitans* genome

<sup>10</sup># map m/ncRNA: the number of reads mapping to an mRNA or ncRNA

<sup>11</sup>% map m/ncRNA: percentage of *A. actinomycetemcomitans* reads mapping to an mRNA or ncRNA

**Table S2. *A. actinomycetemcomitans* mRNA 5' ends.**

| <b>Locus tag</b> | <b>Strand</b> | <b>Location</b> |
|------------------|---------------|-----------------|
| D7S_0002         | -             | 1043            |
| D7S_0003         | +             | 1245            |
| D7S_0007         | +             | 3771            |
| D7S_0009         | -             | 6554            |
| D7S_0010         | +             | 6680            |
| D7S_0011         | +             | 7997            |
| D7S_0013         | -             | 11453           |
| D7S_0020         | -             | 19228           |
| D7S_0022         | -             | 22231           |
| D7S_0031         | -             | 32204           |
| D7S_0047         | +             | 43172           |
| D7S_0056         | -             | 54459           |
| D7S_0058         | -             | 56413           |
| D7S_0059         | +             | 56773           |
| D7S_0068         | -             | 68466           |
| D7S_0076         | -             | 83001           |
| D7S_0077         | -             | 83790           |
| D7S_0078         | -             | 84259           |
| D7S_0079         | +             | 84351           |
| D7S_0081         | -             | 87603           |
| D7S_0086         | -             | 95480           |
| D7S_0093         | +             | 100507          |
| D7S_0097         | -             | 103646          |
| D7S_0105         | -             | 108910          |
| D7S_0106         | +             | 109030          |
| D7S_0107         | -             | 111330          |
| D7S_0108         | +             | 111544          |
| D7S_0110         | -             | 116124          |
| D7S_0111         | +             | 116253          |
| D7S_0115         | -             | 119354          |
| D7S_0117         | -             | 120460          |
| D7S_0121         | -             | 127359          |
| D7S_0123         | -             | 128225          |
| D7S_0124         | -             | 130159          |
| D7S_0125         | +             | 130248          |
| D7S_0126         | -             | 131085          |
| D7S_0146         | -             | 147852          |
| D7S_0149         | -             | 150062          |
| D7S_0149         | -             | 150053          |
| D7S_0150         | +             | 150160          |
| D7S_0152         | -             | 153530          |
| D7S_0156         | -             | 156554          |
| D7S_0159         | -             | 160264          |
| D7S_0166         | -             | 169514          |
| D7S_0167         | +             | 169531          |
| D7S_0168         | +             | 170404          |

|          |   |        |
|----------|---|--------|
| D7S_0170 | + | 171896 |
| D7S_0171 | + | 174628 |
| D7S_0177 | - | 179773 |
| D7S_0177 | - | 179942 |
| D7S_0179 | - | 181359 |
| D7S_0180 | + | 181595 |
| D7S_0184 | - | 188946 |
| D7S_0185 | + | 189181 |
| D7S_0195 | - | 202657 |
| D7S_0196 | + | 202772 |
| D7S_0202 | + | 208352 |
| D7S_0204 | + | 210954 |
| D7S_0205 | + | 211434 |
| D7S_0213 | - | 219426 |
| D7S_0214 | + | 219589 |
| D7S_0219 | - | 224927 |
| D7S_0229 | - | 235293 |
| D7S_0233 | + | 237059 |
| D7S_0235 | - | 240333 |
| D7S_0236 | + | 240628 |
| D7S_0238 | + | 242811 |
| D7S_0247 | - | 253036 |
| D7S_0248 | + | 253048 |
| D7S_0248 | + | 253079 |
| D7S_0250 | + | 255444 |
| D7S_0256 | - | 264572 |
| D7S_0262 | - | 267795 |
| D7S_0266 | - | 271779 |
| D7S_0268 | + | 271887 |
| D7S_0295 | - | 288047 |
| D7S_0296 | + | 288174 |
| D7S_0305 | + | 296158 |
| D7S_0316 | - | 308142 |
| D7S_0323 | - | 315182 |
| D7S_0324 | + | 315478 |
| D7S_0325 | - | 319314 |
| D7S_0329 | - | 324697 |
| D7S_0331 | + | 325481 |
| D7S_0337 | - | 332359 |
| D7S_0339 | + | 334983 |
| D7S_0349 | - | 346430 |
| D7S_0352 | + | 348115 |
| D7S_0355 | - | 351741 |
| D7S_0357 | + | 352901 |
| D7S_0364 | - | 361549 |
| D7S_0380 | - | 370235 |
| D7S_0381 | + | 371312 |
| D7S_0383 | - | 376191 |
| D7S_0384 | + | 376272 |

|          |   |        |
|----------|---|--------|
| D7S_0387 | + | 379549 |
| D7S_0389 | + | 382156 |
| D7S_0397 | + | 388728 |
| D7S_0401 | - | 395251 |
| D7S_0402 | - | 396662 |
| D7S_0402 | - | 396620 |
| D7S_0407 | - | 402277 |
| D7S_0408 | - | 403511 |
| D7S_0413 | - | 407926 |
| D7S_0414 | + | 408065 |
| D7S_0434 | - | 426427 |
| D7S_0435 | - | 427865 |
| D7S_0436 | - | 428742 |
| D7S_0439 | - | 430951 |
| D7S_0440 | - | 431511 |
| D7S_0441 | + | 432599 |
| D7S_0443 | + | 434829 |
| D7S_0445 | + | 435406 |
| D7S_0447 | - | 438236 |
| D7S_0448 | - | 440406 |
| D7S_0451 | - | 442691 |
| D7S_0459 | + | 451207 |
| D7S_0460 | - | 452875 |
| D7S_0461 | - | 454033 |
| D7S_0462 | + | 454166 |
| D7S_0464 | - | 456260 |
| D7S_0465 | - | 458041 |
| D7S_0467 | + | 459154 |
| D7S_0471 | - | 463347 |
| D7S_0472 | + | 463483 |
| D7S_0480 | + | 467126 |
| D7S_0483 | + | 469219 |
| D7S_0485 | - | 472853 |
| D7S_0486 | + | 473964 |
| D7S_0487 | + | 474988 |
| D7S_0490 | - | 479149 |
| D7S_0491 | + | 479281 |
| D7S_0495 | + | 482075 |
| D7S_0498 | - | 485773 |
| D7S_0499 | + | 485853 |
| D7S_0506 | + | 492528 |
| D7S_0507 | + | 492988 |
| D7S_0508 | + | 494393 |
| D7S_0510 | - | 496520 |
| D7S_0515 | - | 500322 |
| D7S_0516 | + | 501007 |
| D7S_0519 | + | 503303 |
| D7S_0522 | + | 504519 |
| D7S_0526 | + | 506388 |

|          |   |        |
|----------|---|--------|
| D7S_0537 | - | 517925 |
| D7S_0546 | + | 526122 |
| D7S_0552 | - | 536527 |
| D7S_0554 | + | 537152 |
| D7S_0560 | + | 545545 |
| D7S_0562 | + | 546826 |
| D7S_0563 | + | 547801 |
| D7S_0565 | - | 551362 |
| D7S_0574 | - | 559019 |
| D7S_0576 | - | 559931 |
| D7S_0577 | + | 560084 |
| D7S_0578 | + | 561588 |
| D7S_0581 | - | 564200 |
| D7S_0594 | - | 575523 |
| D7S_0595 | + | 575799 |
| D7S_0604 | - | 585408 |
| D7S_0606 | + | 585720 |
| D7S_0611 | - | 593307 |
| D7S_0616 | - | 602064 |
| D7S_0617 | - | 603597 |
| D7S_0618 | - | 604325 |
| D7S_0622 | + | 605900 |
| D7S_0625 | - | 610251 |
| D7S_0633 | - | 613750 |
| D7S_0638 | - | 617816 |
| D7S_0641 | - | 621173 |
| D7S_0642 | + | 621419 |
| D7S_0644 | - | 623495 |
| D7S_0646 | - | 624662 |
| D7S_0647 | - | 625352 |
| D7S_0648 | - | 625821 |
| D7S_0649 | - | 627207 |
| D7S_0650 | + | 627410 |
| D7S_0654 | - | 630643 |
| D7S_0658 | + | 636618 |
| D7S_0660 | + | 638742 |
| D7S_0662 | + | 640245 |
| D7S_0664 | - | 643770 |
| D7S_0668 | - | 646012 |
| D7S_0669 | + | 646143 |
| D7S_0677 | + | 650882 |
| D7S_0684 | - | 657390 |
| D7S_0688 | + | 658919 |
| D7S_0695 | + | 664946 |
| D7S_0696 | - | 666503 |
| D7S_0698 | - | 668726 |
| D7S_0712 | - | 678181 |
| D7S_0713 | + | 678277 |
| D7S_0722 | - | 686914 |

|          |   |        |
|----------|---|--------|
| D7S_0723 | + | 687037 |
| D7S_0736 | - | 699272 |
| D7S_0748 | + | 707118 |
| D7S_0749 | + | 708020 |
| D7S_0750 | + | 709650 |
| D7S_0752 | + | 713175 |
| D7S_0755 | - | 721595 |
| D7S_0757 | + | 721735 |
| D7S_0758 | + | 723735 |
| D7S_0761 | + | 729153 |
| D7S_0767 | - | 733648 |
| D7S_0768 | - | 734259 |
| D7S_0781 | - | 749030 |
| D7S_0809 | - | 762604 |
| D7S_0813 | - | 765934 |
| D7S_0828 | + | 777979 |
| D7S_0838 | + | 785058 |
| D7S_0841 | + | 787131 |
| D7S_0847 | - | 793363 |
| D7S_0848 | + | 793358 |
| D7S_0849 | - | 795016 |
| D7S_0851 | + | 795571 |
| D7S_0850 | - | 795446 |
| D7S_0854 | + | 797852 |
| D7S_0860 | - | 802803 |
| D7S_0861 | + | 802969 |
| D7S_0864 | + | 806416 |
| D7S_0871 | - | 812099 |
| D7S_0873 | - | 812815 |
| D7S_0874 | + | 812945 |
| D7S_0875 | - | 817368 |
| D7S_0877 | + | 818396 |
| D7S_0879 | + | 819968 |
| D7S_0881 | - | 822601 |
| D7S_0883 | - | 823783 |
| D7S_0884 | - | 824072 |
| D7S_0885 | - | 825592 |
| D7S_0886 | + | 825662 |
| D7S_0889 | + | 827967 |
| D7S_0897 | - | 836303 |
| D7S_0902 | + | 836900 |
| D7S_0903 | - | 840390 |
| D7S_0905 | - | 842686 |
| D7S_0906 | + | 842753 |
| D7S_0908 | - | 844887 |
| D7S_0910 | + | 845624 |
| D7S_0912 | - | 848597 |
| D7S_0913 | + | 848643 |
| D7S_0917 | - | 853034 |

|          |   |         |
|----------|---|---------|
| D7S_0919 | - | 854388  |
| D7S_0947 | - | 881570  |
| D7S_0957 | - | 891565  |
| D7S_0959 | - | 893375  |
| D7S_0960 | + | 893484  |
| D7S_0963 | - | 899750  |
| D7S_0969 | + | 903755  |
| D7S_0972 | - | 906595  |
| D7S_0975 | + | 907885  |
| D7S_0984 | - | 920035  |
| D7S_0985 | + | 920143  |
| D7S_0989 | - | 922341  |
| D7S_0996 | - | 926631  |
| D7S_0998 | + | 927256  |
| D7S_1002 | - | 932527  |
| D7S_1003 | + | 932615  |
| D7S_1008 | - | 944894  |
| D7S_1010 | + | 945089  |
| D7S_1012 | + | 946672  |
| D7S_1014 | + | 948442  |
| D7S_1025 | - | 962830  |
| D7S_1026 | + | 962897  |
| D7S_1031 | + | 965390  |
| D7S_1035 | - | 970452  |
| D7S_1036 | + | 970509  |
| D7S_1041 | + | 974814  |
| D7S_1042 | + | 975422  |
| D7S_1051 | - | 984509  |
| D7S_1054 | - | 987961  |
| D7S_1062 | - | 994137  |
| D7S_1065 | + | 994659  |
| D7S_1069 | - | 996889  |
| D7S_1072 | + | 998440  |
| D7S_1080 | - | 1006856 |
| D7S_1081 | + | 1006912 |
| D7S_1084 | + | 1009161 |
| D7S_1087 | + | 1011284 |
| D7S_1097 | - | 1022623 |
| D7S_1099 | - | 1025883 |
| D7S_1100 | + | 1025983 |
| D7S_1102 | - | 1028856 |
| D7S_1103 | + | 1028961 |
| D7S_1109 | - | 1033556 |
| D7S_1116 | + | 1035722 |
| D7S_1120 | - | 1039251 |
| D7S_1122 | - | 1042872 |
| D7S_1128 | + | 1046725 |
| D7S_1138 | - | 1056597 |
| D7S_1139 | + | 1056691 |

|          |   |         |
|----------|---|---------|
| D7S_1145 | - | 1061753 |
| D7S_1146 | + | 1061791 |
| D7S_1151 | - | 1067455 |
| D7S_1153 | - | 1070199 |
| D7S_1158 | - | 1071633 |
| D7S_1158 | - | 1071663 |
| D7S_1160 | - | 1073444 |
| D7S_1161 | - | 1074449 |
| D7S_1162 | - | 1075060 |
| D7S_1163 | - | 1075614 |
| D7S_1164 | + | 1075653 |
| D7S_1166 | + | 1077729 |
| D7S_1169 | + | 1079242 |
| D7S_1172 | - | 1083350 |
| D7S_1173 | + | 1083435 |
| D7S_1181 | - | 1088962 |
| D7S_1182 | + | 1089062 |
| D7S_1186 | + | 1092204 |
| D7S_1188 | + | 1094186 |
| D7S_1189 | + | 1095834 |
| D7S_1192 | + | 1097456 |
| D7S_1195 | + | 1101206 |
| D7S_1200 | - | 1105902 |
| D7S_1201 | + | 1106011 |
| D7S_1204 | - | 1108478 |
| D7S_1205 | + | 1108641 |
| D7S_1210 | + | 1113221 |
| D7S_1216 | + | 1117859 |
| D7S_1219 | - | 1121198 |
| D7S_1220 | + | 1121406 |
| D7S_1234 | + | 1133115 |
| D7S_1242 | - | 1139413 |
| D7S_1243 | + | 1139353 |
| D7S_1244 | - | 1140502 |
| D7S_1245 | + | 1140541 |
| D7S_1248 | - | 1145644 |
| D7S_1249 | - | 1147238 |
| D7S_1250 | + | 1147416 |
| D7S_1256 | - | 1151991 |
| D7S_1257 | + | 1152123 |
| D7S_1259 | + | 1153245 |
| D7S_1265 | + | 1157613 |
| D7S_1274 | - | 1165680 |
| D7S_1277 | + | 1167698 |
| D7S_1279 | - | 1179524 |
| D7S_1281 | - | 1172113 |
| D7S_1282 | + | 1172363 |
| D7S_1282 | + | 1172285 |
| D7S_1310 | + | 1195141 |



|          |   |         |
|----------|---|---------|
| D7S_1312 | - | 1198195 |
| D7S_1313 | - | 1198748 |
| D7S_1314 | + | 1198917 |
| D7S_1318 | - | 1204953 |
| D7S_1321 | + | 1206747 |
| D7S_1333 | - | 1220996 |
| D7S_1345 | + | 1232014 |
| D7S_1346 | - | 1233644 |
| D7S_1352 | + | 1237043 |
| D7S_1359 | - | 1244843 |
| D7S_1362 | - | 1248259 |
| D7S_1363 | + | 1248467 |
| D7S_1374 | - | 1261690 |
| D7S_1386 | - | 1272472 |
| D7S_1387 | + | 1272648 |
| D7S_1392 | - | 1276986 |
| D7S_1393 | + | 1277095 |
| D7S_1395 | - | 1280356 |
| D7S_1396 | + | 1280490 |
| D7S_1397 | - | 1282381 |
| D7S_1400 | + | 1284246 |
| D7S_1402 | - | 1286686 |
| D7S_1403 | + | 1286820 |
| D7S_1410 | - | 1294936 |
| D7S_1415 | - | 1299850 |
| D7S_1416 | - | 1303146 |
| D7S_1417 | + | 1303305 |
| D7S_1424 | + | 1307245 |
| D7S_1427 | + | 1309068 |
| D7S_1429 | + | 1310044 |
| D7S_1454 | - | 1330196 |
| D7S_1456 | - | 1333995 |
| D7S_1457 | - | 1334732 |
| D7S_1459 | + | 1336820 |
| D7S_1463 | - | 1342151 |
| D7S_1488 | - | 1363040 |
| D7S_1489 | + | 1363427 |
| D7S_1491 | + | 1364297 |
| D7S_1493 | + | 1366956 |
| D7S_1495 | + | 1368463 |
| D7S_1496 | + | 1372012 |
| D7S_1497 | + | 1372738 |
| D7S_1500 | + | 1376057 |
| D7S_1502 | + | 1377919 |
| D7S_1514 | + | 1391218 |
| D7S_1518 | + | 1396220 |
| D7S_1520 | + | 1397580 |
| D7S_1522 | + | 1399999 |
| D7S_1524 | + | 1402077 |

|          |   |         |
|----------|---|---------|
| D7S_1528 | - | 1405402 |
| D7S_1530 | + | 1406535 |
| D7S_1532 | + | 1409085 |
| D7S_1536 | - | 1414780 |
| D7S_1538 | + | 1414922 |
| D7S_1544 | + | 1420989 |
| D7S_1548 | + | 1424133 |
| D7S_1551 | + | 1424905 |
| D7S_1553 | - | 1426295 |
| D7S_1558 | - | 1431161 |
| D7S_1559 | + | 1431359 |
| D7S_1561 | - | 1434822 |
| D7S_1562 | - | 1434811 |
| D7S_1564 | + | 1434840 |
| D7S_1568 | + | 1441024 |
| D7S_1574 | - | 1448012 |
| D7S_1575 | - | 1449238 |
| D7S_1576 | + | 1449401 |
| D7S_1586 | - | 1461563 |
| D7S_1588 | + | 1461750 |
| D7S_1589 | - | 1463037 |
| D7S_1590 | - | 1464961 |
| D7S_1592 | + | 1465083 |
| D7S_1599 | - | 1470756 |
| D7S_1600 | - | 1471887 |
| D7S_1604 | + | 1474116 |
| D7S_1607 | - | 1477998 |
| D7S_1625 | - | 1492051 |
| D7S_1627 | + | 1492742 |
| D7S_1629 | + | 1493698 |
| D7S_1632 | + | 1496051 |
| D7S_1637 | - | 1504429 |
| D7S_1647 | + | 1513672 |
| D7S_1653 | + | 1518449 |
| D7S_1656 | - | 1520838 |
| D7S_1659 | - | 1524231 |
| D7S_1660 | - | 1525165 |
| D7S_1661 | + | 1525406 |
| D7S_1662 | + | 1527206 |
| D7S_1665 | - | 1531695 |
| D7S_1667 | + | 1531772 |
| D7S_1669 | - | 1533942 |
| D7S_1672 | - | 1536590 |
| D7S_1673 | + | 1536723 |
| D7S_1683 | - | 1546312 |
| D7S_1684 | - | 1548056 |
| D7S_1687 | - | 1549614 |
| D7S_1688 | + | 1549759 |
| D7S_1691 | + | 1552179 |

|          |   |         |
|----------|---|---------|
| D7S_1694 | - | 1555156 |
| D7S_1695 | + | 1555258 |
| D7S_1696 | + | 1556128 |
| D7S_1700 | + | 1558861 |
| D7S_1702 | + | 1559404 |
| D7S_1704 | + | 1561358 |
| D7S_1712 | + | 1567345 |
| D7S_1714 | - | 1569874 |
| D7S_1715 | - | 1570368 |
| D7S_1717 | - | 1572282 |
| D7S_1717 | - | 1572259 |
| D7S_1719 | - | 1572822 |
| D7S_1720 | - | 1573449 |
| D7S_1727 | - | 1580035 |
| D7S_1729 | + | 1580167 |
| D7S_1731 | + | 1581991 |
| D7S_1734 | - | 1584594 |
| D7S_1746 | - | 1600106 |
| D7S_1751 | - | 1602528 |
| D7S_1752 | - | 1603659 |
| D7S_1764 | - | 1613368 |
| D7S_1766 | - | 1614940 |
| D7S_1767 | + | 1615039 |
| D7S_1776 | - | 1627100 |
| D7S_1777 | + | 1627163 |
| D7S_1778 | - | 1629230 |
| D7S_1779 | - | 1629890 |
| D7S_1780 | - | 1630934 |
| D7S_1781 | + | 1630941 |
| D7S_1791 | - | 1640402 |
| D7S_1793 | + | 1641254 |
| D7S_1797 | + | 1645382 |
| D7S_1800 | + | 1647779 |
| D7S_1806 | - | 1655291 |
| D7S_1809 | + | 1656217 |
| D7S_1816 | - | 1662867 |
| D7S_1816 | - | 1662904 |
| D7S_1817 | + | 1663051 |
| D7S_1818 | + | 1663726 |
| D7S_1822 | + | 1668787 |
| D7S_1828 | + | 1675296 |
| D7S_1832 | + | 1679699 |
| D7S_1839 | + | 1684846 |
| D7S_1842 | + | 1685814 |
| D7S_1844 | - | 1688299 |
| D7S_1845 | + | 1688412 |
| D7S_1847 | - | 1691925 |
| D7S_1848 | + | 1692036 |
| D7S_1856 | + | 1700448 |

|          |   |         |
|----------|---|---------|
| D7S_1857 | + | 1701583 |
| D7S_1857 | + | 1701467 |
| D7S_1875 | - | 1713111 |
| D7S_1877 | + | 1713224 |
| D7S_1882 | - | 1718419 |
| D7S_1888 | - | 1722888 |
| D7S_1889 | - | 1723672 |
| D7S_1892 | + | 1725104 |
| D7S_1891 | - | 1725234 |
| D7S_1893 | - | 1726503 |
| D7S_1894 | + | 1726569 |
| D7S_1895 | + | 1728217 |
| D7S_1898 | + | 1729671 |
| D7S_1903 | + | 1735042 |
| D7S_1906 | + | 1737242 |
| D7S_1913 | - | 1745843 |
| D7S_1921 | - | 1755676 |
| D7S_1923 | + | 1755948 |
| D7S_1924 | + | 1758580 |
| D7S_1928 | + | 1762689 |
| D7S_1936 | - | 1769966 |
| D7S_1938 | + | 1770154 |
| D7S_1940 | - | 1774065 |
| D7S_1946 | + | 1775993 |
| D7S_1954 | + | 1784458 |
| D7S_1955 | + | 1785432 |
| D7S_1958 | - | 1788624 |
| D7S_1959 | + | 1788660 |
| D7S_1960 | + | 1788959 |
| D7S_1963 | - | 1792917 |
| D7S_1964 | + | 1792960 |
| D7S_1965 | - | 1795131 |
| D7S_1966 | + | 1795137 |
| D7S_1969 | + | 1799004 |
| D7S_1970 | + | 1799490 |
| D7S_1980 | + | 1807633 |
| D7S_1982 | + | 1809698 |
| D7S_1991 | + | 1816595 |
| D7S_1993 | + | 1818041 |
| D7S_1998 | + | 1822395 |
| D7S_2002 | - | 1828085 |
| D7S_2003 | + | 1828217 |
| D7S_2006 | - | 1832727 |
| D7S_2008 | + | 1832830 |
| D7S_2010 | + | 1833683 |
| D7S_2011 | + | 1835494 |
| D7S_2015 | - | 1841430 |
| D7S_2016 | - | 1841978 |
| D7S_2017 | + | 1842197 |

|          |   |         |
|----------|---|---------|
| D7S_2026 | - | 1849269 |
| D7S_2027 | + | 1849433 |
| D7S_2029 | + | 1852884 |
| D7S_2030 | + | 1853814 |
| D7S_2032 | - | 1856957 |
| D7S_2033 | + | 1857007 |
| D7S_2036 | - | 1860344 |
| D7S_2037 | - | 1861912 |
| D7S_2038 | - | 1862767 |
| D7S_2042 | - | 1866744 |
| D7S_2045 | + | 1868206 |
| D7S_2048 | - | 1871948 |
| D7S_2053 | - | 1878151 |
| D7S_2055 | + | 1878294 |
| D7S_2058 | - | 1883141 |
| D7S_2060 | - | 1885342 |
| D7S_2061 | + | 1885383 |
| D7S_2062 | - | 1888813 |
| D7S_2064 | - | 1890877 |
| D7S_2065 | + | 1891187 |
| D7S_2065 | + | 1891150 |
| D7S_2066 | - | 1893462 |
| D7S_2068 | - | 1894959 |
| D7S_2069 | - | 1896256 |
| D7S_2070 | + | 1896385 |
| D7S_2073 | - | 1898633 |
| D7S_2077 | - | 1901508 |
| D7S_2079 | + | 1901710 |
| D7S_2086 | - | 1907788 |
| D7S_2088 | + | 1908298 |
| D7S_2090 | - | 1910123 |
| D7S_2091 | - | 1911281 |
| D7S_2093 | - | 1913265 |
| D7S_2100 | + | 1917397 |
| D7S_2102 | - | 1922378 |
| D7S_2105 | - | 1926865 |
| D7S_2106 | - | 1927851 |
| D7S_2107 | + | 1928079 |
| D7S_2111 | - | 1933428 |
| D7S_2112 | + | 1933542 |
| D7S_2116 | - | 1938990 |
| D7S_2117 | + | 1939009 |
| D7S_2123 | - | 1943858 |
| D7S_2124 | + | 1943964 |
| D7S_2125 | + | 1945322 |
| D7S_2126 | + | 1946666 |
| D7S_2128 | - | 1948519 |
| D7S_2129 | - | 1950864 |
| D7S_2130 | + | 1951079 |

|          |   |         |
|----------|---|---------|
| D7S_2139 | + | 1956853 |
| D7S_2141 | + | 1964544 |
| D7S_2143 | + | 1967945 |
| D7S_2147 | + | 1970186 |
| D7S_2147 | + | 1970247 |
| D7S_2152 | + | 1973612 |
| D7S_2156 | - | 1978223 |
| D7S_2162 | + | 1982617 |
| D7S_2161 | - | 1982639 |
| D7S_2166 | - | 1986526 |
| D7S_2168 | - | 1987668 |
| D7S_2169 | + | 1987802 |
| D7S_2171 | + | 1990297 |
| D7S_2185 | + | 2006686 |
| D7S_2191 | + | 2012300 |
| D7S_2195 | - | 2019824 |
| D7S_2196 | + | 2020049 |
| D7S_2197 | - | 2022411 |
| D7S_2201 | - | 2026559 |
| D7S_2202 | + | 2026692 |
| D7S_2204 | - | 2031982 |
| D7S_2205 | + | 2032135 |
| D7S_2212 | + | 2038044 |
| D7S_2220 | - | 2049114 |
| D7S_2232 | - | 2062005 |
| D7S_2233 | + | 2062176 |
| D7S_2238 | - | 2070033 |
| D7S_2238 | - | 2070038 |
| D7S_2242 | - | 2072616 |
| D7S_2243 | + | 2072769 |
| D7S_2244 | + | 2074291 |
| D7S_2249 | - | 2078917 |
| D7S_2252 | + | 2081552 |
| D7S_2261 | - | 2090084 |
| D7S_2262 | - | 2091080 |
| D7S_2263 | + | 2091007 |
| D7S_2266 | - | 2093698 |
| D7S_2267 | + | 2093462 |
| D7S_2274 | - | 2101826 |
| D7S_2276 | - | 2105256 |
| D7S_2277 | + | 2104582 |
| D7S_2278 | - | 2106816 |
| D7S_2279 | + | 2106840 |
| D7S_2279 | + | 2106856 |
| D7S_2280 | - | 2107842 |
| D7S_2281 | + | 2107962 |
| D7S_2283 | - | 2109264 |
| D7S_2284 | + | 2109972 |
| D7S_2285 | + | 2110891 |

|          |   |         |
|----------|---|---------|
| D7S_2288 | + | 2115486 |
| D7S_2289 | - | 2119468 |
| D7S_2291 | + | 2119473 |
| D7S_2295 | + | 2123163 |
| D7S_2297 | + | 2124428 |
| D7S_2301 | - | 2128715 |
| D7S_2309 | + | 2131489 |
| D7S_2311 | - | 2134192 |
| D7S_2312 | + | 2134269 |
| D7S_2313 | + | 2135256 |
| D7S_2324 | - | 2146798 |
| D7S_2325 | + | 2146939 |
| D7S_2330 | - | 2151578 |
| D7S_2334 | - | 2156128 |
| D7S_2336 | - | 2158071 |
| D7S_2341 | - | 2163186 |
| D7S_2344 | + | 2166606 |
| D7S_2345 | + | 2166885 |
| D7S_2346 | + | 2167864 |
| D7S_2348 | + | 2169008 |
| D7S_2363 | - | 2179137 |
| D7S_2364 | + | 2179129 |
| D7S_2365 | + | 2180381 |
| D7S_2367 | + | 2182578 |
| D7S_2368 | - | 2185329 |
| D7S_2369 | + | 2185389 |
| D7S_2378 | - | 2193195 |
| D7S_2382 | + | 2195695 |
| D7S_2384 | - | 2198350 |
| D7S_2385 | + | 2198408 |
| D7S_2391 | - | 2202748 |
| D7S_2392 | + | 2202921 |
| D7S_2401 | - | 2212354 |
| D7S_2403 | - | 2213563 |
| D7S_2404 | + | 2213729 |
| D7S_2408 | - | 2219193 |
| D7S_2412 | + | 2220932 |
| D7S_2413 | + | 2221377 |
| D7S_2414 | - | 2224612 |
| D7S_2416 | - | 2227820 |
| D7S_2417 | + | 2227982 |
| D7S_2424 | + | 2231434 |
| D7S_2433 | + | 2240761 |
| D7S_2439 | + | 2247620 |
| D7S_2450 | - | 2257764 |
| D7S_2453 | + | 2259711 |
| D7S_2460 | - | 2269924 |
| D7S_2462 | + | 2270269 |
| D7S_2466 | - | 2275008 |

|          |   |         |
|----------|---|---------|
| D7S_2474 | - | 2282730 |
| D7S_2475 | + | 2284947 |
| D7S_2477 | - | 2284315 |
| D7S_2479 | + | 2285812 |
| D7S_2483 | - | 2289440 |
| D7S_2484 | + | 2289503 |
| D7S_2489 | + | 2294176 |
| D7S_2497 | - | 2303058 |



**Table S3. A. actinomycetemcomitans ncRNAs.**

| <b>Locus tag</b> | <b>Start</b> | <b>Stop</b> | <b>Strand</b> | <b>Product</b>                                       |
|------------------|--------------|-------------|---------------|------------------------------------------------------|
| D7S_0016.1       | 14947        | 14962       | -             | cis-antisense to D7S_0016                            |
| D7S_0017.1       | 15764        | 15781       | -             | cis-antisense to D7S_0017                            |
| D7S_0031.1       | 32497        | 33701       | +             | sRNA                                                 |
| D7S_0043.1       | 41437        | 41836       | +             | sRNA, RNaseP A                                       |
| D7S_0102.1       | 106478       | 106550      | +             | cis-antisense to D7S_0102                            |
| D7S_0104.1       | 106909       | 107092      | -             | cis-antisense to D7S_0104                            |
| D7S_0140.1       | 139731       | 139747      | +             | cis-antisense to D7S_0140                            |
| D7S_0150.1       | 150160       | 150357      | +             | riboswitch, lysine riboswitch                        |
| D7S_0157.1       | 156975       | 156990      | +             | cis-antisense to D7S_0157                            |
| D7S_0157.2       | 157367       | 157382      | +             | cis-antisense to D7S_0157                            |
| D7S_0159.1       | 159928       | 159944      | +             | cis-antisense to D7S_0159                            |
| D7S_0164.1       | 167019       | 167036      | +             | cis-antisense to D7S_0164                            |
| D7S_0167.1       | 170245       | 170260      | -             | cis-antisense to D7S_0167                            |
| D7S_0168.1       | 170404       | 170654      | +             | sRNA                                                 |
| D7S_0170.1       | 173749       | 173764      | -             | cis-antisense to D7S_0170                            |
| D7S_0185.1       | 191678       | 192283      | -             | CRISPR1 crRNA                                        |
| D7S_0219.1       | 223814       | 223831      | +             | cis-antisense to D7S_0219                            |
| D7S_0222.1       | 227103       | 227157      | +             | cis-antisense to D7S_0222                            |
| D7S_0222.2       | 227938       | 228045      | +             | cis-antisense to D7S_0222                            |
| D7S_0235.1       | 240380       | 240648      | -             | sRNA, GcvB                                           |
| D7S_0246.1       | 250512       | 250563      | -             | cis-antisense to D7S_0246                            |
| D7S_0247.1       | 252200       | 252216      | +             | cis-antisense to D7S_0247                            |
| D7S_0252.1       | 258997       | 259130      | -             | sRNA                                                 |
| D7S_0257.1       | 264893       | 264909      | +             | cis-antisense to D7S_0257                            |
| D7S_0268.1       | 275375       | 283978      | +             | CRISPR2 crRNA                                        |
| D7S_0307.1       | 298320       | 299386      | -             | cis-antisense to D7S_0307                            |
| D7S_0317.1       | 308638       | 308899      | -             | cis-antisense to D7S_0317                            |
| D7S_0322.1       | 313712       | 313779      | +             | cis-antisense to D7S_0322                            |
| D7S_0331.1       | 325762       | 325945      | +             | sRNA, same strand as D7S_0331 with internal promoter |
| D7S_0343.1       | 340697       | 340887      | +             | sRNA, tfoR                                           |
| D7S_0344.1       | 340808       | 341027      | -             | cis-antisense to D7S_0344 and D7S_0343.1             |
| D7S_0348.1       | 345114       | 345184      | -             | sRNA                                                 |
| D7S_0349.1       | 345784       | 345803      | +             | cis-antisense to D7S_0349                            |
| D7S_0349.2       | 346495       | 346710      | -             | sRNA                                                 |
| D7S_0356.1       | 352763       | 352835      | +             | sRNA                                                 |
| D7S_0389.1       | 382720       | 382760      | -             | cis-antisense to D7S_0389                            |
| D7S_0396.1       | 388578       | 388605      | +             | cis-antisense to D7S_0396                            |
| D7S_0396.2       | 388608       | 388678      | -             | sRNA                                                 |
| D7S_0403.1       | 400019       | 400051      | -             | cis-antisense to D7S_0403                            |
| D7S_0408.1       | 402651       | 402666      | +             | cis-antisense to D7S_0408                            |
| D7S_0415.1       | 410451       | 410499      | -             | cis-antisense to D7S_0415                            |
| D7S_0447.1       | 437242       | 437333      | +             | cis-antisense to D7S_0447                            |
| D7S_0452.1       | 442836       | 442943      | +             | sRNA                                                 |
| D7S_0456.2       | 448372       | 448501      | -             | sRNA                                                 |
| D7S_0467.1       | 460649       | 460671      | -             | cis-antisense to D7S_0467                            |
| D7S_0470.1       | 462343       | 462401      | -             | cis-antisense to D7S_0470                            |
| D7S_0482.1       | 468848       | 468950      | -             | cis-antisense to D7S_0482.1                          |
| D7S_0482.2       | 469050       | 469190      | -             | sRNA                                                 |

|            |         |         |   |                            |
|------------|---------|---------|---|----------------------------|
| D7S_0485.1 | 473534  | 473626  | - | sRNA                       |
| D7S_0495.1 | 482773  | 482831  | + | sRNA                       |
| D7S_0497.1 | 484257  | 484271  | + | cis-antisense to D7S_0497  |
| D7S_0515.1 | 500015  | 500149  | - | sRNA, internal to D7S_0515 |
| D7S_0515.2 | 500612  | 500912  | + | sRNA                       |
| D7S_0517.1 | 502039  | 502070  | - | cis-antisense to D7S_0517  |
| D7S_0526.1 | 507883  | 507949  | + | sRNA                       |
| D7S_0538.1 | 518055  | 518318  | + | sRNA                       |
| D7S_0551.1 | 534760  | 534804  | + | cis-antisense to D7S_0551  |
| D7S_0553.1 | 536951  | 536993  | + | sRNA                       |
| D7S_0553.2 | 537029  | 537080  | + | sRNA                       |
| D7S_0554.1 | 538498  | 538513  | - | cis-antisense to D7S_0554  |
| D7S_0572.1 | 555010  | 555112  | - | cis-antisense to D7S_0572  |
| D7S_0574.1 | 556575  | 556613  | + | cis-antisense to D7S_0574  |
| D7S_0574.2 | 558114  | 558129  | + | cis-antisense to D7S_0574  |
| D7S_0578.1 | 561890  | 562248  | - | cis-antisense to D7S_0578  |
| D7S_0597.2 | 578495  | 578858  | - | cis-antisense to D7S_0597  |
| D7S_0634.1 | 614750  | 614804  | + | cis-antisense to D7S_0634  |
| D7S_0647.1 | 625156  | 625264  | + | cis-antisense to D7S_0647  |
| D7S_0649.1 | 625936  | 625954  | + | cis-antisense to D7S_0649  |
| D7S_0656.1 | 633616  | 633694  | + | cis-antisense to D7S_0656  |
| D7S_0661.1 | 640001  | 640182  | + | sRNA, his leader           |
| D7S_0684.1 | 657498  | 657572  | - | sRNA                       |
| D7S_0742.1 | 704584  | 704734  | - | sRNA                       |
| D7S_0743.1 | 704845  | 704936  | - | tRNA                       |
| D7S_0751.1 | 712928  | 712948  | - | cis-antisense to D7S_0751  |
| D7S_0752.1 | 713687  | 713705  | - | cis-antisense to D7S_0752  |
| D7S_0761.1 | 731348  | 731492  | + | sRNA                       |
| D7S_0762.1 | 731606  | 731703  | + | sRNA                       |
| D7S_0810.1 | 763555  | 763593  | + | cis-antisense to D7S_0810  |
| D7S_0836.1 | 784901  | 785002  | + | sRNA                       |
| D7S_0846.1 | 791940  | 791989  | + | cis-antisense to D7S_0846  |
| D7S_0847.1 | 792446  | 792461  | + | cis-antisense to D7S_0847  |
| D7S_0847.2 | 792646  | 792686  | + | cis-antisense to D7S_0847  |
| D7S_0849.1 | 794824  | 795016  | - | sRNA, 6S RNA               |
| D7S_0897.1 | 835688  | 835733  | + | cis-antisense to D7S_0897  |
| D7S_0924.1 | 859790  | 859821  | - | cis-antisense to D7S_0924  |
| D7S_0939.1 | 874282  | 874311  | + | sRNA                       |
| D7S_1003.1 | 933877  | 933937  | - | cis-antisense to D7S_1003  |
| D7S_1037.1 | 972598  | 972720  | + | sRNA                       |
| D7S_1042.1 | 976574  | 976619  | - | cis-antisense to D7S_1042  |
| D7S_1070.1 | 997006  | 997048  | + | cis-antisense to D7S_1070  |
| D7S_1076.1 | 1002883 | 1002918 | - | cis-antisense to D7S_1076  |
| D7S_1093.1 | 1016903 | 1016943 | + | cis-antisense to D7S_1093  |
| D7S_1120.1 | 1039142 | 1039215 | + | cis-antisense to D7S_1120  |
| D7S_1144.1 | 1061183 | 1061215 | + | cis-antisense to D7S_1144  |
| D7S_1156.1 | 1070845 | 1070862 | + | cis-antisense to D7S_1156  |
| D7S_1171.1 | 1081777 | 1081864 | + | sRNA                       |
| D7S_1171.2 | 1081874 | 1081905 | + | sRNA                       |
| D7S_1184.1 | 1090894 | 1090910 | - | cis-antisense to D7S_1184  |
| D7S_1188.1 | 1095662 | 1095700 | - | cis-antisense to D7S_1188  |

|            |         |         |   |                                |
|------------|---------|---------|---|--------------------------------|
| D7S_1198.1 | 1104145 | 1104317 | + | cis-antisense to D7S_1198      |
| D7S_1215.1 | 1117427 | 1117467 | - | cis-antisense to D7S_1215      |
| D7S_1245.1 | 1140829 | 1140844 | - | cis-antisense to D7S_1245      |
| D7S_1258.1 | 1153014 | 1153080 | + | sRNA                           |
| D7S_1261.1 | 1156006 | 1156051 | + | cis-antisense to D7S_1261      |
| D7S_1262.1 | 1156183 | 1156200 | + | cis-antisense to D7S_1262      |
| D7S_1287.1 | 1177085 | 1177114 | - | cis-antisense to D7S_1287      |
| D7S_1287.2 | 1178600 | 1178705 | - | sRNA                           |
| D7S_1295.1 | 1185139 | 1185452 | - | cis-antisense to D7S_1295      |
| D7S_1314.1 | 1200430 | 1200462 | + | sRNA                           |
| D7S_1340.1 | 1228871 | 1228917 | - | cis-antisense to D7S_1340      |
| D7S_1349.1 | 1234765 | 1234808 | + | cis-antisense to D7S_1349      |
| D7S_1355.1 | 1239939 | 1240032 | - | cis-antisense to D7S_1355      |
| D7S_1357.1 | 1242024 | 1242040 | - | cis-antisense to D7S_1357      |
| D7S_1370.1 | 1257230 | 1258225 | + | cis-antisense to D7S_1371      |
| D7S_1426.1 | 1308993 | 1309085 | - | sRNA                           |
| D7S_1442.1 | 1322703 | 1322802 | - | sRNA                           |
| D7S_1442.2 | 1323184 | 1323273 | - | sRNA, C4                       |
| D7S_1445.1 | 1324187 | 1324246 | + | sRNA                           |
| D7S_1453.1 | 1328727 | 1328812 | - | sRNA                           |
| D7S_1454.1 | 1330343 | 1330779 | - | sRNA tmRNA                     |
| D7S_1456.1 | 1333819 | 1333854 | + | cis-antisense to D7S_1456      |
| D7S_1470.1 | 1348215 | 1348288 | - | cis-antisense to D7S_1470      |
| D7S_1472.1 | 1349399 | 1349626 | + | cis-antisense to D7S_1472      |
| D7S_1494.1 | 1367977 | 1368055 | + | sRNA                           |
| D7S_1499.1 | 1374646 | 1374693 | - | cis-antisense to D7S_1499      |
| D7S_1506.1 | 1382162 | 1382212 | - | cis-antisense to D7S_1506      |
| D7S_1507.1 | 1383609 | 1383641 | - | cis-antisense to D7S_1507      |
| D7S_1507.2 | 1383666 | 1383704 | - | cis-antisense to D7S_1507      |
| D7S_1507.3 | 1384160 | 1384175 | - | cis-antisense to D7S_1507      |
| D7S_1515.1 | 1393292 | 1393336 | - | cis-antisense to D7S_1515      |
| D7S_1523.1 | 1401855 | 1401942 | + | sRNA                           |
| D7S_1525.1 | 1403416 | 1403668 | - | cis-antisense to D7S_1525      |
| D7S_1551.1 | 1424905 | 1424934 | + | sRNA                           |
| D7S_1553.1 | 1426152 | 1426193 | + | cis-antisense to D7S_1553      |
| D7S_1564.1 | 1435506 | 1435611 | + | sRNA                           |
| D7S_1568.1 | 1442328 | 1442363 | + | sRNA                           |
| D7S_1588.1 | 1462976 | 1463013 | + | sRNA                           |
| D7S_1605.1 | 1475587 | 1475632 | + | sRNA                           |
| D7S_1605.2 | 1475915 | 1475962 | + | sRNA                           |
| D7S_1607.1 | 1477807 | 1477998 | - | riboswtich, FMN riboswitch     |
| D7S_1613.1 | 1483249 | 1483324 | + | cis-antisense to D7S_1613      |
| D7S_1630.1 | 1494145 | 1494175 | - | cis-antisense to D7S_1630      |
| D7S_1636.1 | 1503367 | 1503464 | + | sRNA                           |
| D7S_1636.2 | 1503370 | 1503503 | - | sRNA                           |
| D7S_1653.1 | 1518749 | 1518782 | - | cis-antisense to D7S_1653      |
| D7S_1655.1 | 1520580 | 1520641 | + | sRNA                           |
| D7S_1716.1 | 1572027 | 1572259 | - | riboswitch, glycine riboswitch |
| D7S_1718.1 | 1572415 | 1572460 | + | cis-antisense to D7S_1718      |
| D7S_1732.1 | 1583072 | 1583192 | - | cis-antisense to D7S_1732      |
| D7S_1752.1 | 1602865 | 1603069 | + | cis-antisense to D7S_1752      |

|            |         |         |   |                               |
|------------|---------|---------|---|-------------------------------|
| D7S_1761.1 | 1609880 | 1609918 | + | cis-antisense to D7S_1761     |
| D7S_1767.1 | 1615039 | 1615163 | + | sRNA                          |
| D7S_1775.1 | 1625510 | 1625647 | - | sRNA                          |
| D7S_1778.1 | 1628997 | 1629020 | + | cis-antisense to D7S_1778     |
| D7S_1782.1 | 1632121 | 1632141 | + | sRNA                          |
| D7S_1797.1 | 1645382 | 1645670 | + | sRNA                          |
| D7S_1810.1 | 1656737 | 1656807 | - | cis-antisense to D7S_1810     |
| D7S_1846.1 | 1689712 | 1689794 | + | cis-antisense to D7S_1846     |
| D7S_1856.1 | 1700858 | 1700908 | - | cis-antisense to D7S_1856     |
| D7S_1867.1 | 1706719 | 1706809 | - | sRNA                          |
| D7S_1868.1 | 1707072 | 1707347 | + | cis-antisense to D7S_1868     |
| D7S_1888.1 | 1722858 | 1722888 | - | sRNA                          |
| D7S_1888.2 | 1722955 | 1723039 | - | sRNA                          |
| D7S_1907.1 | 1738826 | 1738866 | - | cis-antisense to D7S_1907     |
| D7S_1911.1 | 1743052 | 1743092 | + | cis-antisense to D7S_1911     |
| D7S_1913.1 | 1745736 | 1745960 | + | sRNA                          |
| D7S_1951.1 | 1781732 | 1781833 | + | sRNA                          |
| D7S_1976.1 | 1804114 | 1804164 | + | cis-antisense to D7S_1976     |
| D7S_1982.1 | 1810023 | 1810068 | - | cis-antisense to D7S_1982     |
| D7S_1988.1 | 1814620 | 1814658 | - | cis-antisense to D7S_1988     |
| D7S_2023.1 | 1847194 | 1847474 | + | cis-antisense to D7S_2023     |
| D7S_2044.1 | 1867693 | 1867734 | - | cis-antisense to D7S_2044     |
| D7S_2053.1 | 1878003 | 1878151 | - | sRNA                          |
| D7S_2063.1 | 1888879 | 1888950 | - | sRNA                          |
| D7S_2076.1 | 1900304 | 1900357 | + | cis-antisense to D7S_2076     |
| D7S_2102.1 | 1922286 | 1922383 | + | cis-antisense to D7S_2102     |
| D7S_2116.1 | 1938281 | 1938331 | + | cis-antisense to D7S_2116     |
| D7S_2134.1 | 1953778 | 1953813 | - | cis-antisense to D7S_2134     |
| D7S_2162.1 | 1982826 | 1982925 | - | cis-antisense to D7S_2162     |
| D7S_2177.1 | 2000337 | 2000483 | + | CRISPR associated sRNA        |
| D7S_2184.1 | 2005945 | 2006618 | + | CRISPR3 crRNA                 |
| D7S_2202.1 | 2027982 | 2028056 | - | sRNA                          |
| D7S_2206.1 | 2032994 | 2033043 | - | cis-antisense to D7S_2206     |
| D7S_2213.1 | 2041033 | 2041063 | - | cis-antisense to D7S_2213     |
| D7S_2231.1 | 2060780 | 2060828 | + | cis-antisense to D7S_2231     |
| D7S_2242.1 | 2072534 | 2072549 | + | cis-antisense to D7S_2242     |
| D7S_2250.1 | 2079744 | 2079790 | + | cis-antisense to D7S_2250     |
| D7S_2270.1 | 2096164 | 2096331 | + | sRNA bacterial SRP            |
| D7S_2277.1 | 2105271 | 2105349 | + | sRNA                          |
| D7S_2289.1 | 2116928 | 2117222 | + | cis-antisense to D7S_2289     |
| D7S_2303.1 | 2129430 | 2129471 | + | cis-antisense to D7S_2303     |
| D7S_2303.2 | 2129615 | 2129652 | + | cis-antisense to D7S_2303     |
| D7S_2307.1 | 2131026 | 2131123 | - | sRNA, upstream of transposase |
| D7S_2313.1 | 2135514 | 2135600 | + | sRNA                          |
| D7S_2321.1 | 2143796 | 2143836 | + | cis-antisense to D7S_2321     |
| D7S_2328.1 | 2150815 | 2150850 | - | sRNA                          |
| D7S_2336.1 | 2158023 | 2158059 | + | cis-antisense to D7S_2336     |
| D7S_2341.1 | 2163072 | 2163186 | - | sRNA                          |
| D7S_2341.2 | 2163321 | 2163458 | - | sRNA                          |
| D7S_2350.1 | 2170929 | 2170970 | - | cis-antisense to D7S_2350     |
| D7S_2351.1 | 2172577 | 2172722 | + | sRNA                          |

|            |         |         |   |                           |
|------------|---------|---------|---|---------------------------|
| D7S_2363.1 | 2178947 | 2178961 | + | cis-antisense to D7S_2363 |
| D7S_2364.1 | 2179938 | 2179979 | - | cis-antisense to D7S_2364 |
| D7S_2365.1 | 2180664 | 2180705 | - | cis-antisense to D7S_2365 |
| D7S_2383.1 | 2197276 | 2197308 | - | sRNA                      |
| D7S_2395.1 | 2204771 | 2204868 | - | sRNA                      |
| D7S_2430.1 | 2238476 | 2238491 | - | cis-antisense to D7S_2430 |
| D7S_2436.1 | 2243568 | 2243608 | - | cis-antisense to D7S_2436 |
| D7S_2443.1 | 2250251 | 2250292 | - | cis-antisense to D7S_2443 |
| D7S_2502.1 | 2307237 | 2307338 | - | cis-antisense to D7S_2502 |

**Table S4. A. *actinomycescomitans* genes and ncRNAs up-regulated *in vivo*.**

| <b>Locus tag</b> | <b>Fold Change</b> | <b>P-value</b> | <b>COG<sup>1</sup></b> | <b>Product</b>                                      |
|------------------|--------------------|----------------|------------------------|-----------------------------------------------------|
| D7S_0029         | 5.94               | 1.00E-04       | [C]                    | oxaloacetate decarboxylase beta chain               |
| D7S_0030         | 4.35               | 9.20E-04       | [C]                    | oxaloacetate decarboxylase alpha subunit            |
| D7S_0031         | 8.65               | 1.40E-05       | [C]                    | oxaloacetate decarboxylase gamma chain 3            |
| D7S_0108         | 12.14              | 1.70E-06       | [C]                    | cytochrome c-type protein TorY                      |
| D7S_0109         | 10.24              | 1.50E-06       | [C]                    | biotin sulfoxide reductase                          |
| D7S_0465         | 8.34               | 4.60E-02       | [C]                    | glycerol-3-phosphate dehydrogenase                  |
| D7S_0546         | 2.74               | 2.50E-02       | [C]                    | oxidoreductase domain protein                       |
| D7S_1060         | 3.71               | 3.20E-02       | [C]                    | NADH:ubiquinone oxidoreductase                      |
| D7S_1414         | 9.88               | 3.80E-03       | [C]                    | anaerobic dimethyl sulfoxide reductase chain B      |
| D7S_1533         | 9.97               | 6.80E-04       | [C]                    | fumarate reductase subunit D                        |
| D7S_1534         | 11.77              | 3.00E-06       | [C]                    | fumarate reductase subunit C                        |
| D7S_1535         | 10.97              | 1.50E-05       | [C]                    | fumarate reductase iron-sulfur subunit              |
| D7S_1536         | 11.14              | 6.30E-06       | [C]                    | fumarate reductase, flavoprotein subunit            |
| D7S_1995         | 5.39               | 2.20E-03       | [C]                    | cytochrome c nitrite reductase, Fe-S protein        |
| D7S_2162         | 4.06               | 4.80E-03       | [C]                    | acylphosphatase                                     |
| D7S_2219         | 30.88              | 4.00E-05       | [C]                    | formate dehydrogenase, alpha subunit                |
| D7S_2220         | 133.47             | 1.30E-06       | [C]                    | formate dehydrogenase H                             |
| D7S_2222         | 9.08               | 1.60E-04       | [C]                    | hydrogenase maturation peptidase Hycl               |
| D7S_2224         | 5.31               | 3.70E-04       | [C]                    | hydrogenase-4 component I                           |
| D7S_2225         | 14.36              | 2.40E-06       | [C]                    | hydrogenase-4 component H                           |
| D7S_2226         | 10.34              | 1.50E-06       | [C]                    | hydrogenase-4 component G                           |
| D7S_2228         | 15.35              | 7.20E-06       | [C]                    | hydrogenase-4 component E                           |
| D7S_2230         | 8.21               | 2.70E-03       | [C]                    | hydrogenase-4 component C                           |
| D7S_2232         | 13.68              | 2.20E-06       | [C]                    | electron transport protein HydN                     |
| D7S_2391         | 3.05               | 1.80E-02       | [C]                    | ferredoxin--NADP reductase                          |
| D7S_2227         | 23.6               | 2.30E-04       | [CP]                   | hydrogenase-4 component F                           |
| D7S_2229         | 4.91               | 3.80E-02       | [CP]                   | hydrogenase-4 component D                           |
| D7S_2231         | 10.55              | 1.30E-03       | [CP]                   | hydrogenase-4 component B                           |
| D7S_1515         | 4.56               | 2.20E-02       | [D]                    | cell division protein FtsA                          |
| D7S_1516         | 2.24               | 4.80E-02       | [D]                    | cell division protein FtsZ                          |
| D7S_1709         | 4.28               | 1.30E-02       | [D]                    | sodium/pantothenate symporter                       |
| D7S_1673         | 3.03               | 3.50E-02       | [E]                    | D, D-heptose 1, 7-bisphosphate phosphatase          |
| D7S_1848         | 3.36               | 4.70E-02       | [E]                    | ornithine carbamoyltransferase                      |
| D7S_1982         | 2.9                | 1.40E-02       | [E]                    | heme ABC exporter, ATP-binding protein CcmA         |
| D7S_2036         | 5.93               | 1.00E-04       | [E]                    | tyrosine-specific transporter                       |
| D7S_2039         | 3.61               | 6.10E-03       | [E]                    | DNA repair protein RecO                             |
| D7S_2065         | 2.52               | 3.30E-02       | [E]                    | glutamine synthetase, type I                        |
| D7S_2202         | 3.99               | 5.90E-03       | [E]                    | peptidase T                                         |
| D7S_0681         | 8.3                | 2.30E-04       | [EP]                   | oligopeptide transport system permease protein OppC |
| D7S_1708         | 2.89               | 1.80E-02       | [ER]                   | sodium/pantothenate symporter                       |
| D7S_1817         | 3.69               | 5.20E-03       | [F]                    | guanylate kinase                                    |
| D7S_0082         | 2.94               | 2.90E-02       | [G]                    | starch synthase                                     |

|          |       |          |        |                                                                     |
|----------|-------|----------|--------|---------------------------------------------------------------------|
| D7S_0083 | 5.66  | 2.90E-02 | [G]    | glucose-1-phosphate adenylyltransferase                             |
| D7S_0084 | 4.42  | 8.00E-03 | [G]    | glycogen debranching enzyme GlgX                                    |
| D7S_0086 | 7.35  | 1.60E-04 | [G]    | 4-alpha-glucanotransferase                                          |
| D7S_0439 | 3.54  | 1.80E-02 | [G]    | pts system maltose- and glucose-specific eicb component             |
| D7S_0592 | 4.43  | 2.50E-03 | [G]    | hexulose-6-phosphate isomerase, putative                            |
| D7S_0981 | 5.91  | 3.30E-04 | [G]    | MglA protein                                                        |
| D7S_1256 | 2.9   | 4.90E-02 | [G]    | fructose-1, 6-bisphosphatase, class II                              |
| D7S_1573 | 5.38  | 1.20E-02 | [G]    | ribose import ATP-binding protein RbsA                              |
| D7S_1794 | 5.29  | 1.50E-03 | [G]    | fructose permease iic component                                     |
| D7S_1795 | 3.09  | 1.60E-02 | [G]    | mannose permease iid component                                      |
| D7S_1909 | 4.42  | 5.00E-03 | [G]    | keto-hydroxyglutarate-aldolase/keto-deoxy-phosphogluconate aldolase |
| D7S_1912 | 3.51  | 3.20E-02 | [G]    | mannonate dehydratase                                               |
| D7S_1913 | 3.08  | 3.40E-02 | [G]    | DctP protein                                                        |
| D7S_1914 | 5.66  | 2.20E-02 | [G]    | TRAP dicarboxylate transporter, DctM subunit                        |
| D7S_2384 | 4.91  | 1.80E-03 | [G]    | fructosamine kinase                                                 |
| D7S_2398 | 5.53  | 3.50E-04 | [G]    | tagatose-bisphosphate aldolase noncatalytic subunit                 |
| D7S_1218 | 2.93  | 8.60E-03 | [GEPR] | transporter protein                                                 |
| D7S_1981 | 3.25  | 1.10E-02 | [GEPR] | Bcr/CflA subfamily drug resistance transporter                      |
| D7S_0006 | 2.65  | 3.60E-02 | [H]    | molybdopterin converting factor, subunit 2                          |
| D7S_0011 | 4.13  | 2.50E-03 | [H]    | dethiobiotin synthase                                               |
| D7S_2055 | 2.72  | 2.70E-02 | [H]    | nicotinamide phosphoribosyltransferase                              |
| D7S_2312 | 4     | 1.40E-03 | [H]    | biotin--protein ligase                                              |
| D7S_0301 | 4.82  | 1.40E-03 | [I]    | phospholipase D/Transphosphatidylase                                |
| D7S_1194 | 6.3   | 1.80E-04 | [I]    | phospholipase D/Transphosphatidylase                                |
| D7S_1385 | 3.26  | 1.30E-02 | [I]    | 1-acyl-sn-glycerol-3-phosphate acyltransferase                      |
| D7S_0153 | 19.37 | 1.90E-02 | [J]    | putative translation initiation inhibitor, YjgF family protein      |
| D7S_0361 | 3.46  | 2.60E-02 | [J]    | ribosome-binding factor A                                           |
| D7S_0362 | 4.6   | 3.00E-04 | [J]    | translation initiation factor IF-2                                  |
| D7S_1538 | 5.23  | 2.90E-04 | [J]    | putative lysyl-tRNA synthetase-like protein GenX                    |
| D7S_1710 | 3.45  | 1.70E-02 | [J]    | ribosomal protein L11 methyltransferase                             |
| D7S_1889 | 6.26  | 2.40E-02 | [J]    | peptidyl-tRNA hydrolase                                             |
| D7S_1980 | 3.94  | 1.20E-02 | [J]    | ribosomal small subunit pseudouridine synthase A                    |
| D7S_2331 | 2.51  | 1.80E-02 | [J]    | hypothetical protein                                                |
| D7S_0919 | 5.8   | 5.80E-05 | [K]    | RNA polymerase sigma factor RpoE                                    |
| D7S_0989 | 3.38  | 6.40E-03 | [K]    | LysR family transcriptional regulator                               |
| D7S_1049 | 2.93  | 2.90E-02 | [K]    | YqgE like protein                                                   |
| D7S_1219 | 3.15  | 3.30E-02 | [K]    | transcription termination factor Rho                                |
| D7S_1245 | 3.52  | 5.30E-03 | [K]    | DNA-binding transcriptional regulator OxyR                          |
| D7S_1263 | 5.14  | 3.70E-02 | [K]    | transcriptional regulator, HxIR family                              |
| D7S_1818 | 2.65  | 2.40E-02 | [K]    | DNA-directed RNA polymerase, omega subunit                          |
| D7S_0593 | 3.42  | 4.00E-02 | [KG]   | HTH-type transcriptional regulator UlaR                             |

|          |       |          |       |                                                       |
|----------|-------|----------|-------|-------------------------------------------------------|
| D7S_2171 | 2.74  | 3.30E-02 | [KL]  | putative DEAD/DEAH box helicase                       |
| D7S_0873 | 3.54  | 7.00E-03 | [KT]  | LexA repressor                                        |
| D7S_1772 | 2.82  | 3.20E-02 | [KT]  | sugar diacid utilization regulator                    |
| D7S_2309 | 5.61  | 5.90E-03 | [KT]  | ImpA protein                                          |
| D7S_0101 | 6.5   | 6.30E-03 | [L]   | Transposase for insertion sequence element ISAp11     |
| D7S_0102 | 7.75  | 4.90E-03 | [L]   | Transposase                                           |
| D7S_0104 | 2.69  | 2.40E-02 | [L]   | transposase, IS4 family protein                       |
| D7S_0290 | 3.14  | 2.10E-02 | [L]   | Tra5 protein                                          |
| D7S_0291 | 3.71  | 4.80E-03 | [L]   | Tra5 protein                                          |
| D7S_0292 | 7.05  | 1.30E-04 | [L]   | Tra5 protein                                          |
| D7S_0427 | 6.73  | 5.00E-04 | [L]   | D-alanyl-D-alanine carboxypeptidase/endopeptidase     |
| D7S_1107 | 2.88  | 1.80E-02 | [L]   | heptosyltransferase family                            |
| D7S_1459 | 2.67  | 2.20E-02 | [L]   | protein RecA                                          |
| D7S_1472 | 4.51  | 1.40E-03 | [L]   | Tra5 protein                                          |
| D7S_1561 | 7.37  | 1.20E-03 | [L]   | RecN protein                                          |
| D7S_1723 | 3.53  | 1.10E-02 | [L]   | Tra5 protein                                          |
| D7S_1724 | 9.86  | 2.90E-05 | [L]   | Tra5 protein                                          |
| D7S_1813 | 7.9   | 2.10E-05 | [L]   | integrase, catalytic region                           |
| D7S_1868 | 5.05  | 2.80E-03 | [L]   | Tra5 protein                                          |
| D7S_2182 | 2.87  | 4.80E-02 | [L]   | CRISPR-associated protein Cas4                        |
| D7S_2244 | 2.87  | 1.50E-02 | [L]   | DNA helicase II                                       |
| D7S_1769 | 3.78  | 2.10E-03 | [LKJ] | preprotein translocase subunit SecF                   |
| D7S_1148 | 3.35  | 1.40E-02 | [LR]  | translocase                                           |
| D7S_0843 | 3.2   | 3.10E-02 | [M]   | excinuclease ABC subunit B                            |
| D7S_1096 | 3.82  | 5.80E-03 | [M]   | AcrA protein                                          |
| D7S_1097 | 3.34  | 2.20E-02 | [M]   | AcrR protein                                          |
| D7S_1503 | 2.92  | 1.70E-02 | [M]   | S-adenosyl-methyltransferase MraW                     |
| D7S_1513 | 4.23  | 1.80E-02 | [M]   | D-alanine--D-alanine ligase B                         |
| D7S_1514 | 2.59  | 2.20E-02 | [M]   | cell division protein FtsQ                            |
| D7S_1559 | 10.87 | 1.10E-02 | [M]   | outer membrane protein W precursor                    |
| D7S_1560 | 5.48  | 1.50E-03 | [M]   | outer membrane protein W precursor                    |
| D7S_2252 | 7.92  | 1.60E-05 | [M]   | Lsg locus putative protein 4                          |
| D7S_0033 | 3.47  | 3.20E-03 | [O]   | hydrogenase assembly chaperone HypC/HupF              |
| D7S_0254 | 3.23  | 1.50E-02 | [O]   | hydrogenase expression/formation protein HypE         |
| D7S_0255 | 4.95  | 2.70E-04 | [O]   | hydrogenase expression/formation protein HypD         |
| D7S_0615 | 3.44  | 2.00E-02 | [O]   | hemolysin-activating lysine-acyltransferase HlyC      |
| D7S_0764 | 7.4   | 6.70E-04 | [O]   | anaerobic ribonucleotide reductase-activating protein |
| D7S_1312 | 3.21  | 6.20E-03 | [O]   | chaperonin GroS                                       |
| D7S_1395 | 20.39 | 4.60E-10 | [O]   | ATP-dependent chaperone ClpB                          |
| D7S_1564 | 2.7   | 1.80E-02 | [O]   | co-chaperone GrpE                                     |
| D7S_1923 | 3.6   | 2.50E-03 | [O]   | ATP-dependent protease La                             |
| D7S_1962 | 2.54  | 2.80E-02 | [O]   | oxido-reductase                                       |
| D7S_2129 | 4.81  | 1.40E-02 | [O]   | chaperone protein DnaK                                |



|            |        |          |      |                                                             |
|------------|--------|----------|------|-------------------------------------------------------------|
| D7S_2233   | 7.47   | 2.80E-02 | [O]  | HypF protein                                                |
| D7S_2469   | 3.07   | 2.50E-02 | [O]  | putative M22 peptidase-like protein YeaZ                    |
| D7S_0256   | 3.22   | 6.60E-03 | [OK] | hydrogenase accessory protein HypB                          |
| D7S_0068   | 2.63   | 3.40E-02 | [P]  | nonheme iron-containing ferritin                            |
| D7S_0905   | 2.79   | 4.60E-02 | [P]  | iron donor protein CyaY                                     |
| D7S_1993   | 7.12   | 6.00E-05 | [P]  | cytochrome c nitrite reductase                              |
| D7S_1996   | 14.85  | 3.40E-05 | [P]  | NrfD protein                                                |
| D7S_2027   | 2.6    | 3.30E-02 | [P]  | formate/nitrite transporter                                 |
| D7S_2383   | 8.81   | 4.20E-02 | [P]  | small multidrug resistance protein                          |
| D7S_1093   | 11.61  | 3.40E-02 | [QR] | methyltransferase domain family                             |
| D7S_0130   | 3.31   | 1.10E-02 | [R]  | Zn-ribbon-containing, possibly nucleic-acid-binding protein |
| D7S_0151   | 3.08   | 4.70E-02 | [R]  | Sel1 domain protein repeat-containing protein               |
| D7S_0594   | 3.85   | 5.30E-03 | [R]  | putative L-ascorbate 6-phosphate lactonase                  |
| D7S_1196   | 3.39   | 6.90E-03 | [R]  | Sel1 domain protein repeat-containing protein               |
| D7S_1375   | 3.45   | 1.10E-02 | [R]  | putative membrane protein                                   |
| D7S_1412   | 4.86   | 3.20E-02 | [R]  | Twin-arginine leader-binding protein DmsD                   |
| D7S_1490   | 7.52   | 5.70E-04 | [R]  | putative metalloprotease in flp 5' region                   |
| D7S_1588   | 2.57   | 2.50E-02 | [R]  | magnesium and cobalt efflux protein CorC                    |
| D7S_1768   | 2.41   | 2.30E-02 | [R]  | lipoprotein Nlpl                                            |
| D7S_1796   | 2.6    | 4.40E-02 | [R]  | Cof protein                                                 |
| D7S_2176   | 2.55   | 4.70E-02 | [R]  | virulence protein                                           |
| D7S_2195   | 3.23   | 1.20E-02 | [R]  | C4-dicarboxylate membrane transporter                       |
| D7S_2330   | 2.7    | 2.30E-02 | [R]  | RNA-binding protein Hfq                                     |
| D7S_2341   | 2.98   | 1.20E-02 | [R]  | sulfatase                                                   |
| D7S_2374   | 3.07   | 1.30E-02 | [R]  | Sel1 domain protein repeat-containing protein               |
| D7S_0302   | 2.71   | 1.60E-02 | [S]  | Rhs element Vgr protein                                     |
| D7S_0330   | 14.51  | 4.50E-02 | [S]  | membrane protein                                            |
| D7S_0419   | 8.2    | 5.50E-06 | [S]  | Rhs element Vgr protein                                     |
| D7S_0725   | 3.92   | 7.60E-04 | [S]  | Rhs element Vgr protein                                     |
| D7S_1193   | 3.11   | 4.80E-03 | [S]  | Rhs element Vgr protein                                     |
| D7S_1502   | 3.3    | 1.20E-02 | [S]  | MraZ protein                                                |
| D7S_1601   | 2.79   | 1.70E-02 | [S]  | tRNA pseudouridine synthase D                               |
| D7S_1690   | 4.31   | 7.30E-03 | [S]  | Rhs element Vgr protein                                     |
| D7S_1707   | 3.07   | 3.30E-02 | [S]  | acetyl-CoA carboxylase biotin carboxylase subunit           |
| D7S_2157   | 34.02  | 8.40E-06 | [S]  | smr domain protein                                          |
| D7S_2248   | 5.9    | 2.70E-03 | [S]  | toxin                                                       |
| D7S_2376   | 5.55   | 2.90E-03 | [S]  | Rhs element Vgr protein                                     |
| D7S_2377   | 3.32   | 3.20E-03 | [S]  | Rhs family protein                                          |
| D7S_0917   | 3.02   | 2.80E-02 | [T]  | periplasmic negative regulator of sigmaE                    |
| D7S_0918   | 4.53   | 1.00E-03 | [T]  | sigma-E factor negative regulatory protein                  |
| D7S_0684   | 3.34   | 5.50E-03 | [TK] | TorCAD operon transcriptional regulatory protein TorR       |
| D7S_0759   | 2.42   | 4.80E-02 | [UW] | extracellular matrix protein adhesin A                      |
| D7S_0016.1 | 128.15 | 4.00E-11 | -    | cis-antisense to D7S_0016                                   |
| D7S_0017.1 | Inf    | 5.10E-03 | -    | cis-antisense to D7S_0017                                   |
| D7S_0140.1 | Inf    | 6.80E-04 | -    | cis-antisense to D7S_0140                                   |
| D7S_0152   | 4.59   | 3.80E-02 | -    | hypothetical protein                                        |
| D7S_0159.1 | Inf    | 4.60E-05 | -    | cis-antisense to D7S_0159                                   |

|            |        |          |   |                                            |
|------------|--------|----------|---|--------------------------------------------|
| D7S_0164.1 | 91.02  | 3.40E-02 | - | cis-antisense to D7S_0164                  |
| D7S_0219.1 | 49.69  | 3.00E-03 | - | cis-antisense to D7S_0219                  |
| D7S_0247.1 | 5.6    | 4.00E-02 | - | cis-antisense to D7S_0247                  |
| D7S_0253   | 4.34   | 1.30E-02 | - | hypothetical protein                       |
| D7S_0408.1 | 88.86  | 4.50E-05 | - | cis-antisense to D7S_0408                  |
| D7S_0420   | 4.6    | 4.20E-03 | - | glycoside hydrolase, family 19, putative   |
| D7S_0421   | 4.15   | 1.70E-03 | - | glycoside hydrolase, family 19, putative   |
| D7S_0456.2 | 13.32  | 8.10E-03 | - | sRNA                                       |
| D7S_0467.1 | 119.87 | 4.60E-11 | - | cis-antisense to D7S_0467                  |
| D7S_0482.1 | 7.79   | 5.10E-05 | - | cis-antisense to D7S_0482.1                |
| D7S_0482.2 | 4.17   | 4.30E-03 | - | sRNA                                       |
| D7S_0497.1 | Inf    | 1.40E-04 | - | cis-antisense to D7S_0497                  |
| D7S_0578.1 | 3.94   | 9.90E-03 | - | cis-antisense to D7S_0578                  |
| D7S_0616   | 9.53   | 6.10E-03 | - | serine hydroxymethyltransferase            |
| D7S_0649.1 | Inf    | 1.20E-02 | - | cis-antisense to D7S_0649                  |
| D7S_0656.1 | 7.94   | 4.50E-02 | - | cis-antisense to D7S_0656                  |
| D7S_0706   | 2.79   | 2.40E-02 | - | hypothetical protein                       |
| D7S_0752.1 | 579.87 | 2.20E-16 | - | cis-antisense to D7S_0752                  |
| D7S_0761.1 | 4.03   | 3.40E-02 | - | sRNA                                       |
| D7S_0762.1 | 3.12   | 6.90E-03 | - | sRNA                                       |
| D7S_0836.1 | 9.72   | 1.00E-02 | - | sRNA                                       |
| D7S_1062   | 12.52  | 8.10E-07 | - | hypothetical protein                       |
| D7S_1192   | 3.76   | 4.60E-03 | - | hypothetical protein                       |
| D7S_1198.1 | 6.31   | 2.20E-03 | - | cis-antisense to D7S_1198                  |
| D7S_1245.1 | Inf    | 1.80E-07 | - | cis-antisense to D7S_1245                  |
| D7S_1262.1 | Inf    | 7.30E-05 | - | cis-antisense to D7S_1262                  |
| D7S_1297   | 3.85   | 1.40E-02 | - | FHA domain protein                         |
| D7S_1305   | 13.78  | 8.30E-07 | - | hypothetical protein                       |
| D7S_1306   | 18.38  | 3.90E-05 | - | hypothetical protein                       |
| D7S_1365   | 3.31   | 1.80E-02 | - | hypothetical protein                       |
| D7S_1370.1 | 11.3   | 2.10E-02 | - | cis-antisense to D7S_1371                  |
| D7S_1393   | 5.04   | 2.50E-02 | - | lipoprotein, putative                      |
| D7S_1411   | 9.49   | 3.40E-04 | - | ferredoxin                                 |
| D7S_1423   | 2.52   | 2.50E-02 | - | S-ribosylhomocysteinase                    |
| D7S_1439   | 6.28   | 3.60E-02 | - | hypothetical protein                       |
| D7S_1441   | 5.29   | 3.70E-03 | - | hypothetical protein                       |
| D7S_1551   | 3.92   | 4.50E-02 | - | hypothetical protein                       |
| D7S_1630.1 | 5.94   | 2.70E-03 | - | cis-antisense to D7S_1630                  |
| D7S_1634   | 3.16   | 1.50E-02 | - | hypothetical protein                       |
| D7S_1636.1 | 4.29   | 1.60E-03 | - | sRNA                                       |
| D7S_1636.2 | 21.36  | 5.50E-08 | - | sRNA                                       |
| D7S_1706   | 3.02   | 1.20E-02 | - | chromosomal replication initiation protein |
| D7S_1732.1 | 3      | 3.90E-02 | - | cis-antisense to D7S_1732                  |
| D7S_1737   | 3.27   | 2.80E-02 | - | heavy metal-binding protein, putative      |
| D7S_1757   | 6.76   | 5.00E-04 | - | hypothetical protein                       |
| D7S_1778.1 | 100.03 | 7.80E-03 | - | cis-antisense to D7S_1778                  |
| D7S_1784   | 9.69   | 3.30E-03 | - | hypothetical protein                       |
| D7S_1797.1 | 2.61   | 2.80E-02 | - | sRNA                                       |
| D7S_1913.1 | 30.22  | 7.80E-07 | - | sRNA                                       |

|            |        |          |   |                                                      |
|------------|--------|----------|---|------------------------------------------------------|
| D7S_1955   | 3.09   | 1.20E-02 | - | putative lipoprotein                                 |
| D7S_1976   | 3.54   | 2.50E-02 | - | hypothetical protein                                 |
| D7S_1994   | 6.02   | 6.80E-04 | - | cytochrome c nitrite reductase, pentaheme subunit    |
| D7S_2102.1 | 33.85  | 1.80E-06 | - | cis-antisense to D7S_2102                            |
| D7S_2126   | 3.65   | 2.10E-02 | - | hypothetical protein                                 |
| D7S_2223   | 11.01  | 2.60E-04 | - | hydrogenase-4 component J                            |
| D7S_2242.1 | Inf    | 3.90E-03 | - | cis-antisense to D7S_2242                            |
| D7S_2265   | 30.01  | 5.20E-11 | - | outer-membrane lipoprotein carrier protein precursor |
| D7S_2307.1 | 8.78   | 6.80E-05 | - | sRNA, upstream of transposase                        |
| D7S_2313   | 2.91   | 1.60E-02 | - | hypothetical protein                                 |
| D7S_2313.1 | 2.66   | 2.90E-02 | - | sRNA                                                 |
| D7S_2328.1 | 12.09  | 3.30E-04 | - | sRNA                                                 |
| D7S_2346   | 4.52   | 8.90E-03 | - | hypothetical protein                                 |
| D7S_2348   | 2.84   | 1.20E-02 | - | cytolethal distending toxin protein A                |
| D7S_2351.1 | 2.27   | 3.80E-02 | - | sRNA                                                 |
| D7S_2363.1 | 116.28 | 3.80E-03 | - | cis-antisense to D7S_2363                            |
| D7S_2393   | 5.75   | 1.50E-03 | - | hypothetical protein                                 |
| D7S_2430.1 | 291.91 | 4.80E-03 | - | cis-antisense to D7S_2430                            |
| D7S_2502   | 4.74   | 5.30E-03 | - | putative tail fiber assembly protein                 |

---

<sup>1</sup>COG definitions: C, energy production and conversion; D, cell cycle control and mitosis; E, amino acid metabolism and transport; F, nucleotide metabolism and transport; G, carbohydrate metabolism and transport; H, coenzyme metabolism; I, lipid metabolism; J, translation; K, transcription; L, replication and repair; M, cell wall/membrane/envelope biogenesis; N, cell motility; O, post-translational modification, protein turnover, chaperone functions; P, inorganic ion transport and metabolism; Q, secondary structure; R, general function prediction only; S, function unknown; T, signal transduction; U, intracellular trafficking and secretion; V, defense mechanisms; W, extracellular structures.

**Table S5. A. *actinomycescomitans* genes and ncRNAs down-regulated *in vivo*.**

| <b>Locus tag</b> | <b>Fold change</b> | <b>P-value</b> | <b>COG<sup>1</sup></b> | <b>Product</b>                                                                 |
|------------------|--------------------|----------------|------------------------|--------------------------------------------------------------------------------|
| D7S_0319         | -2.8               | 2.30E-02       | [C]                    | dihydrolipoyl dehydrogenase                                                    |
| D7S_0320         | -3.2               | 1.40E-02       | [C]                    | dihydrolipoyl dehydrogenase                                                    |
| D7S_0321         | -2.8               | 1.60E-02       | [C]                    | dihydrolipoamide acetyltransferase component of pyruvate dehydrogenase complex |
| D7S_0322         | -3                 | 9.70E-03       | [C]                    | pyruvate dehydrogenase subunit E1                                              |
| D7S_0508         | -4.8               | 9.20E-05       | [C]                    | L-lactate transport                                                            |
| D7S_0716         | -2.2               | 4.30E-02       | [C]                    | FeS cluster assembly scaffold IscU                                             |
| D7S_0720         | -7.1               | 5.30E-05       | [C]                    | ferredoxin, 2Fe-2S type, ISC system                                            |
| D7S_0865         | -2.4               | 4.30E-02       | [C]                    | glycerophosphoryl diester phosphodiesterase                                    |
| D7S_1353         | -2.4               | 3.70E-02       | [C]                    | periplasmic nitrate reductase, large subunit                                   |
| D7S_1354         | -2.7               | 1.50E-02       | [C]                    | periplasmic nitrate reductase, large subunit                                   |
| D7S_1358         | -2.9               | 2.00E-02       | [C]                    | cytochrome c-type protein TorC                                                 |
| D7S_1953         | -3.2               | 9.70E-03       | [C]                    | malic enzyme                                                                   |
| D7S_2016         | -5.1               | 1.50E-03       | [C]                    | autonomous glycyl radical cofactor                                             |
| D7S_2235         | -6.7               | 6.80E-05       | [C]                    | formate dehydrogenase, gamma subunit                                           |
| D7S_2237         | -6.3               | 1.40E-05       | [C]                    | formate dehydrogenase, alpha subunit                                           |
| D7S_2238         | -9.4               | 2.40E-08       | [C]                    | formate dehydrogenase, alpha subunit                                           |
| D7S_0723         | -2.7               | 4.50E-02       | [D]                    | Mrp ATPase family protein                                                      |
| D7S_0058         | -5                 | 3.50E-04       | [E]                    | aspartate aminotransferase                                                     |
| D7S_0677         | -4.6               | 6.10E-04       | [E]                    | oligopeptide ABC transporter, periplasmic oligopeptide-binding protein         |
| D7S_0750         | -2.3               | 3.40E-02       | [E]                    | glutamate dehydrogenase                                                        |
| D7S_1883         | -5.8               | 3.20E-03       | [E]                    | protein CysZ                                                                   |
| D7S_1940         | -2.3               | 4.50E-02       | [E]                    | serine transporter                                                             |
| D7S_2198         | -5.5               | 6.60E-05       | [E]                    | ABC transporter ATPase component                                               |
| D7S_1938         | -3.2               | 8.10E-03       | [EJ]                   | L-asparaginase, putative                                                       |
| D7S_2060         | -2.5               | 1.90E-02       | [EM]                   | dihydrodipicolinate synthase                                                   |
| D7S_0022         | -2.7               | 9.50E-03       | [F]                    | ribonucleoside-diphosphate reductase, alpha chain                              |
| D7S_2026         | -3.9               | 4.70E-02       | [FGR]                  | HIT family protein                                                             |
| D7S_1039         | -10.5              | 4.40E-08       | [FR]                   | amidohydrolase family protein SsnA                                             |
| D7S_0017         | -28.8              | 1.30E-13       | [G]                    | rhamnose ABC transporter, rhamnose-binding protein                             |
| D7S_0348         | -16.1              | 7.50E-10       | [G]                    | spermidine/putrescine import ATP-binding protein PotA                          |
| D7S_0738         | -2.8               | 3.60E-02       | [G]                    | D-ribose transporter ATP binding protein                                       |
| D7S_0740         | -3.1               | 2.00E-02       | [G]                    | D-ribose transporter subunit RbsB                                              |
| D7S_0864         | -2.4               | 4.80E-02       | [G]                    | glycerol-3-phosphate transporter                                               |
| D7S_0980         | -3.3               | 6.90E-03       | [G]                    | monosaccharide-transporting ATPase                                             |
| D7S_1318         | -2.4               | 3.60E-02       | [G]                    | PTS system mannose-specific EIIAB component                                    |
| D7S_2024         | -2.8               | 1.60E-02       | [G]                    | beta-hexosaminidase                                                            |
| D7S_2104         | -2.2               | 4.20E-02       | [G]                    | binding-protein-dependent transport systems inner membrane component           |
| D7S_2462         | -5.9               | 1.50E-05       | [G]                    | maltose/maltodextrin import ATP-binding protein MalK                           |

|          |        |          |       |                                                                                       |
|----------|--------|----------|-------|---------------------------------------------------------------------------------------|
| D7S_1113 | -2.5   | 4.00E-02 | [H]   | phosphopantothenoylecysteine<br>decarboxylase/phosphopantothenate--cysteine<br>ligase |
| D7S_2189 | -2.6   | 3.90E-02 | [H]   | biotin synthase                                                                       |
| D7S_2262 | -2.6   | 4.70E-02 | [H]   | GTP cyclohydrolase II                                                                 |
| D7S_0462 | -3     | 2.00E-02 | [I]   | fmn-dependent NADH-azoreductase                                                       |
| D7S_0885 | -2.4   | 3.30E-02 | [I]   | phosphatidylserine synthase                                                           |
| D7S_1434 | -2.1   | 4.80E-02 | [I]   | phospholipase D/Transphosphatidylase                                                  |
| D7S_1602 | -2.5   | 3.30E-02 | [I]   | 2-C-methyl-D-erythritol 4-phosphate<br>cytidyltransferase                             |
| D7S_1568 | -2.4   | 3.30E-02 | [IQ]  | beta-ketoacyl-acyl-carrier-protein synthase II                                        |
| D7S_1167 | -5.5   | 5.60E-05 | [IQR] | short-chain dehydrogenase/reductase SDR                                               |
| D7S_0116 | -4.5   | 3.60E-03 | [J]   | 30S ribosomal protein S9                                                              |
| D7S_0200 | -17.5  | 2.70E-09 | [J]   | peptide chain release factor 3                                                        |
| D7S_0854 | -3.3   | 9.00E-03 | [J]   | ribosomal protein S16                                                                 |
| D7S_0886 | -9.5   | 1.30E-07 | [J]   | ATP-dependent RNA helicase SrmB                                                       |
| D7S_0897 | -2     | 4.20E-02 | [J]   | translation elongation factor Tu                                                      |
| D7S_0922 | -2.3   | 3.30E-02 | [J]   | prolyl-tRNA synthetase                                                                |
| D7S_0975 | -2.3   | 4.50E-02 | [J]   | hypothetical protein                                                                  |
| D7S_0979 | -2.7   | 1.00E-02 | [J]   | translation elongation factor Tu                                                      |
| D7S_1089 | -4.4   | 1.70E-04 | [J]   | RNA methyltransferase                                                                 |
| D7S_1590 | -3.1   | 1.10E-02 | [J]   | translation initiation factor IF-1                                                    |
| D7S_1630 | -192.5 | 2.10E-13 | [J]   | hypothetical protein                                                                  |
| D7S_1863 | -2.4   | 3.50E-02 | [J]   | ribosomal protein L22                                                                 |
| D7S_1864 | -3     | 1.10E-02 | [J]   | ribosomal protein S3                                                                  |
| D7S_1867 | -2.2   | 4.00E-02 | [J]   | ribosomal protein S17                                                                 |
| D7S_1893 | -2.3   | 3.60E-02 | [J]   | 30S ribosomal protein S20                                                             |
| D7S_2394 | -4.2   | 2.80E-04 | [J]   | 50S ribosomal protein L20                                                             |
| D7S_0238 | -3.5   | 1.00E-02 | [K]   | transcriptional regulator NrdR                                                        |
| D7S_0069 | -2.5   | 2.10E-02 | [L]   | exodeoxyribonuclease I                                                                |
| D7S_0645 | -3.8   | 9.20E-03 | [L]   | Holliday junction resolvase                                                           |
| D7S_0661 | -5.3   | 6.00E-04 | [L]   | ribonuclease T                                                                        |
| D7S_0870 | -2.5   | 4.40E-02 | [L]   | single-strand binding protein family                                                  |
| D7S_1014 | -3.9   | 6.70E-04 | [L]   | DNA-binding protein HU                                                                |
| D7S_1110 | -3.6   | 2.20E-03 | [L]   | DNA repair protein RadC                                                               |
| D7S_1143 | -3.2   | 9.80E-03 | [L]   | integrase, catalytic region                                                           |
| D7S_1880 | -4     | 1.60E-03 | [L]   | DNA ligase, NAD-dependent                                                             |
| D7S_2004 | -2.4   | 3.20E-02 | [L]   | DNA replication and repair protein RecF                                               |
| D7S_0043 | -3.6   | 6.50E-03 | [M]   | arabinose 5-phosphate isomerase                                                       |
| D7S_1045 | -2.2   | 4.10E-02 | [M]   | UTP-glucose-1-phosphate uridylyltransferase                                           |
| D7S_1360 | -2.9   | 2.50E-02 | [M]   | lipopolysaccharide heptosyltransferase II                                             |
| D7S_1803 | -2.5   | 1.90E-02 | [M]   | biofilm PGA synthesis N-glycosyltransferase<br>PgaC                                   |
| D7S_0212 | -3.2   | 1.40E-02 | [O]   | formate dehydrogenase accessory protein<br>FdhE                                       |
| D7S_0266 | -2.8   | 9.10E-03 | [O]   | thiol:disulfide interchange protein DsbC                                              |
| D7S_0406 | -3     | 4.30E-02 | [O]   | thioredoxin peroxidase                                                                |
| D7S_0718 | -3.1   | 2.00E-02 | [O]   | Fe-S protein assembly co-chaperone HscB                                               |
| D7S_1244 | -3.4   | 1.80E-03 | [O]   | peroxiredoxin like protein                                                            |
| D7S_1580 | -2.8   | 2.40E-02 | [O]   | DsbB family disulfide bond formation protein                                          |

|            |        |          |      |                                                                                   |
|------------|--------|----------|------|-----------------------------------------------------------------------------------|
| D7S_0696   | -3.2   | 4.00E-03 | [OC] | thioredoxin                                                                       |
| D7S_0221   | -13.1  | 8.90E-05 | [P]  | high-affinity zinc uptake system membrane protein ZnuB                            |
| D7S_0388   | -6.4   | 3.00E-05 | [P]  | periplasmic protein-probably involved in high-affinity Fe <sup>2+</sup> transport |
| D7S_0565   | -2.9   | 6.40E-03 | [P]  | DNA protection during starvation protein                                          |
| D7S_0659   | -6     | 4.50E-02 | [P]  | outer membrane protein 64                                                         |
| D7S_0751   | -3.2   | 8.10E-03 | [P]  | catalase                                                                          |
| D7S_1352   | -2.4   | 3.70E-02 | [P]  | NapD protein                                                                      |
| D7S_2002   | -3.5   | 4.60E-03 | [P]  | copper/zinc superoxide dismutase                                                  |
| D7S_2166   | -2.8   | 1.60E-02 | [P]  | iron ABC superfamily ATP binding cassette transporter, binding protein            |
| D7S_2187   | -3.4   | 5.10E-03 | [P]  | thiamine/thiamine pyrophosphate ABC transporter, permease protein                 |
| D7S_0467   | -3.6   | 2.10E-03 | [R]  | lipoprotein LppC protein                                                          |
| D7S_1025   | -2.5   | 3.30E-02 | [R]  | conserved ATP-binding protein                                                     |
| D7S_1040   | -21.2  | 5.00E-05 | [R]  | nucleoside triphosphate pyrophosphohydrolase                                      |
| D7S_1173   | -2.6   | 3.70E-02 | [R]  | CcmC protein                                                                      |
| D7S_1618   | -74.4  | 9.40E-20 | [R]  | flavodoxin fold family protein                                                    |
| D7S_1669   | -3.9   | 2.50E-03 | [R]  | PEBP family protein                                                               |
| D7S_0171   | -5.2   | 1.40E-04 | [S]  | acetyl-CoA carboxylase subunit beta                                               |
| D7S_0877   | -10    | 1.10E-05 | [S]  | alkylhydroperoxidase AhpD core                                                    |
| D7S_1257   | -3.4   | 1.20E-02 | [S]  | transcriptional regulator                                                         |
| D7S_1610   | -2.3   | 4.30E-02 | [S]  | protein SapB                                                                      |
| D7S_1627   | -3.1   | 3.40E-02 | [S]  | YihD like protein                                                                 |
| D7S_1645   | -76.3  | 2.00E-18 | [S]  | 4-hydroxy-3-methylbut-2-enyl diphosphate reductase                                |
| D7S_2131   | -2.3   | 3.80E-02 | [S]  | hypothetical protein                                                              |
| D7S_2144   | -9.4   | 1.80E-03 | [S]  | Rhs family protein                                                                |
| D7S_2159   | -3.5   | 7.50E-03 | [S]  | inner membrane protein YccF                                                       |
| D7S_2161   | -2.5   | 5.00E-02 | [S]  | hypothetical protein                                                              |
| D7S_2369   | -2.2   | 4.70E-02 | [S]  | hypothetical protein                                                              |
| D7S_2477   | -6.4   | 6.00E-05 | [S]  | secreted protein                                                                  |
| D7S_0541   | -3.2   | 9.00E-03 | [U]  | preprotein translocase subunit YajC                                               |
| D7S_1251   | -2.4   | 2.90E-02 | [U]  | protein-export chaperone SecB                                                     |
| D7S_1790   | -2.4   | 3.00E-02 | [U]  | cell division protein FtsY                                                        |
| D7S_0339   | -3.6   | 1.90E-03 | [V]  | lipid A export permease/ATP-binding protein MsbA                                  |
| D7S_0150.1 | -12.6  | 1.60E-02 | -    | riboswitch, lysine riboswitch                                                     |
| D7S_0154   | -2.4   | 3.00E-02 | -    | hypothetical protein                                                              |
| D7S_0180   | -3.2   | 2.50E-02 | -    | TonB-dependent receptor                                                           |
| D7S_0192   | -2.7   | 1.90E-02 | -    | CRISPR-associated RAMP Csd1 family protein                                        |
| D7S_0234   | -2.9   | 9.40E-03 | -    | hypothetical protein                                                              |
| D7S_0235.1 | -18.4  | 5.30E-11 | -    | sRNA, GcvB                                                                        |
| D7S_0322.1 | -141.2 | 1.80E-15 | -    | cis-antisense to D7S_0322                                                         |
| D7S_0454   | -4.1   | 4.80E-04 | -    | outer membrane protein 100                                                        |
| D7S_0517.1 | -60.4  | 1.60E-11 | -    | cis-antisense to D7S_0517                                                         |
| D7S_0526.1 | -8.7   | 1.10E-02 | -    | sRNA                                                                              |
| D7S_0538   | -2.6   | 2.30E-02 | -    | hypothetical protein                                                              |
| D7S_0551.1 | -Inf   | 1.10E-09 | -    | cis-antisense to D7S_0551                                                         |

|            |          |          |   |                                          |
|------------|----------|----------|---|------------------------------------------|
| D7S_0553.1 | -167.2   | 3.30E-07 | - | sRNA                                     |
| D7S_0572.1 | -11.7    | 2.60E-06 | - | cis-antisense to D7S_0572                |
| D7S_0574.1 | -215.4   | 5.60E-18 | - | cis-antisense to D7S_0574                |
| D7S_0646   | -5.8     | 2.10E-05 | - | excinuclease ABC subunit A               |
| D7S_0726   | -10.8    | 2.30E-08 | - | hypothetical protein                     |
| D7S_0743   | -17.4    | 2.20E-05 | - | hypothetical protein                     |
| D7S_0776   | -87.2    | 2.80E-02 | - | cell wall-associated hydrolase           |
| D7S_0810.1 | -421.2   | 1.30E-03 | - | cis-antisense to D7S_0810                |
| D7S_0926   | -4.4     | 4.70E-04 | - | glycoside hydrolase, family 19, putative |
| D7S_0939.1 | -948.6   | 2.30E-03 | - | sRNA                                     |
| D7S_1093.1 | -216.4   | 7.30E-15 | - | cis-antisense to D7S_1093                |
| D7S_1144.1 | -81.4    | 1.30E-05 | - | cis-antisense to D7S_1144                |
| D7S_1215.1 | -173.4   | 6.00E-04 | - | cis-antisense to D7S_1215                |
| D7S_1261.1 | -54.7    | 6.00E-12 | - | cis-antisense to D7S_1261                |
| D7S_1282   | -4.6     | 2.20E-04 | - | putative FHA domain protein              |
| D7S_1283   | -3.2     | 1.20E-02 | - | hypothetical protein                     |
| D7S_1287.1 | -Inf     | 7.30E-05 | - | cis-antisense to D7S_1287                |
| D7S_1287.2 | -74      | 9.20E-19 | - | sRNA                                     |
| D7S_1349.1 | -115     | 3.80E-10 | - | cis-antisense to D7S_1349                |
| D7S_1426.1 | -5.5     | 1.00E-04 | - | sRNA                                     |
| D7S_1445.1 | -6.4     | 7.40E-05 | - | sRNA                                     |
| D7S_1456   | -3.8     | 1.40E-03 | - | hypothetical protein                     |
| D7S_1515.1 | -18811.8 | 4.20E-50 | - | cis-antisense to D7S_1515                |
| D7S_1551.1 | -4.2     | 1.40E-02 | - | sRNA                                     |
| D7S_1553.1 | -7.5     | 2.50E-05 | - | cis-antisense to D7S_1553                |
| D7S_1704   | -3       | 1.70E-02 | - | hypothetical protein                     |
| D7S_1718.1 | -Inf     | 1.40E-16 | - | cis-antisense to D7S_1718                |
| D7S_1785   | -5       | 3.70E-02 | - | hypothetical protein                     |
| D7S_1804   | -4.1     | 7.80E-03 | - | hypothetical protein                     |
| D7S_1856.1 | -566.2   | 1.40E-17 | - | cis-antisense to D7S_1856                |
| D7S_1867.1 | -19.7    | 2.10E-02 | - | sRNA                                     |
| D7S_1868.1 | -2.5     | 1.70E-02 | - | cis-antisense to D7S_1868                |
| D7S_1888.1 | -7.4     | 6.50E-07 | - | sRNA                                     |
| D7S_1907.1 | -Inf     | 1.50E-03 | - | cis-antisense to D7S_1907                |
| D7S_1911.1 | -Inf     | 7.30E-15 | - | cis-antisense to D7S_1911                |
| D7S_1946   | -2.8     | 1.00E-02 | - | putative FHA domain protein              |
| D7S_2044.1 | -82.5    | 1.60E-13 | - | cis-antisense to D7S_2044                |
| D7S_2076.1 | -628.2   | 1.80E-26 | - | cis-antisense to D7S_2076                |
| D7S_2134.1 | -Inf     | 4.10E-06 | - | cis-antisense to D7S_2134                |
| D7S_2143   | -3.5     | 2.90E-03 | - | hypothetical protein                     |
| D7S_2184.1 | -3.9     | 3.90E-02 | - | CRISPR3 crRNA                            |
| D7S_2213.1 | -112.9   | 3.60E-12 | - | cis-antisense to D7S_2213                |
| D7S_2231.1 | -Inf     | 3.00E-33 | - | cis-antisense to D7S_2231                |
| D7S_2289.1 | -4.6     | 4.10E-02 | - | cis-antisense to D7S_2289                |
| D7S_2321.1 | -38.8    | 5.40E-04 | - | cis-antisense to D7S_2321                |
| D7S_2341.2 | -2.7     | 1.90E-02 | - | sRNA                                     |
| D7S_2350.1 | -34.8    | 3.60E-03 | - | cis-antisense to D7S_2350                |
| D7S_2436.1 | -Inf     | 5.60E-16 | - | cis-antisense to D7S_2436                |
| D7S_2464   | -2.6     | 4.20E-02 | - | maltose operon periplasmic protein       |

---

<sup>1</sup>COG definitions: C, energy production and conversion; D, cell cycle control and mitosis; E, amino acid metabolism and transport; F, nucleotide metabolism and transport; G, carbohydrate metabolism and transport; H, coenzyme metabolism; I, lipid metabolism; J, translation; K, transcription; L, replication and repair; M, cell wall/membrane/envelope biogenesis; N, cell motility; O, post-translational modification, protein turnover, chaperone functions; P, inorganic ion transport and metabolism; Q, secondary structure; R, general function prediction only; S, function unknown; T, signal transduction; U, intracellular trafficking and secretion; V, defense mechanisms; W, extracellular structures.



**Table S6. Primer sequences.**

| <b>Primer</b> | <b>Sequence (5'-3')</b>                           |
|---------------|---------------------------------------------------|
| fdhKO-P1F-USS | AAGTGCGGTCCGGTCAGATTCGTACATACAAC                  |
| fdhKO-P1R-Sp  | CATGTATTCACGAACGAAAATCGAGTAATGTCCTTATTTGAGCTACAAC |
| fdhKO-P2F-Sp  | GAAAACAATAAACCCCTTGCATATGATTTAACGAAAATTACAGCCGC   |
| fdhKO-P2R-USS | AAGTGCGGTTGGCTATCTCTAATAAAAGTTGGGAG               |
| fdhKO-verify  | CTTCAACGCCACTCAATATTTATCC                         |
| frdKO-P1F-USS | AAGTGCGGTGCCACCCGTAAATCTTCCG                      |
| frdKO-P1R-Sp  | CATGTATTCACGAACGAAAATCGGATATTCCTCCAAGTAAAGGGATAG  |
| frdKO-P2F-Sp  | GAAAACAATAAACCCCTTGCATATGCAACAAAAAACGCCCTCAATG    |
| frdKO-P2R-USS | AAGTGCGGTGACCGCACTTTTGCTAACG                      |
| frdKO-verify  | CGCTGGTGATTATCCTGTTC                              |
| pflKO-P1F-USS | AAGTGCGGTTGGTATCTCCGGCAGAAATG                     |
| pflKO-P1R-Sp  | CATGTATTCACGAACGAAAATCGAACAAATTATCTACGACCGGGAAAG  |
| pflKO-P2F-Sp  | GAAAACAATAAACCCCTTGCATATGCAGCCGTTTACCATTTAGGTAAG  |
| pflKO-P2R-USS | AAGTGCGGTGCGACTATTGTAGTGCGCTTTG                   |
| pflKO-verify  | GAATTCACCCGAACGGGTTATG                            |
| Spec-F        | CGTTTTTCGTTTCGTGAATACATG                          |
| Spec-R        | CATATGCAAGGGTTTATTGTTTTTC                         |
| clpX-F        | GCAGAAACCATGGCGCGTATG                             |
| clpX-R        | CAATTCGCTTAATGGCGCCAC                             |
